# Supplementary material for: Resolution of Racemic Aryloxy-Propan-2-yl Acetates via Lipase-Catalyzed Hydrolysis: Preparation of Enantiomerically Pure/Enantioenriched Mexiletine Intermediates and Analogs
Source: MDPI journal article supplement (doi:10.3390/catal12121566), 2022-12-02
Supplement: s1 [file s1]

## SUPPLEMENTARY MATERIALS

### **Resolution of racemic aryloxy-propan-2-yl acetates via lipase-catalyzed hydrolysis: Preparation of the enantiomerically pure/enantioenriched mexiletine intermediates and analogs**

*Ana Caroline Lustosa de Melo Carvalho<sup>1</sup>, Bruna Rocha de Oliveira<sup>1</sup>, Gledson Vieira Lima<sup>1</sup>, Jonatas Martins Negreiro<sup>1</sup>, Maria Conceição Ferreira Oliveira<sup>1</sup>, Telma Leda Gomes de Lemos<sup>1</sup>, Marcos Reinaldo da Silva<sup>2</sup>, Thiago de Sousa Fonseca<sup>3</sup>, Rayanne Mendes Bezerra<sup>4</sup>, Jose Cleiton Sousa dos Santos<sup>4</sup>, Luciana Rocha Barros Gonçalves<sup>5</sup>, Nathalia Saraiva Rios<sup>6</sup>, Geancarlo Zanatta<sup>7</sup> and Marcos Carlos de Mattos<sup>1\*</sup>*

<sup>1</sup> Department of Organic and Inorganic Chemistry, Science Center, Laboratory of Biotechnology and Organic Synthesis (LABS), Federal University of Ceará, Campus do Pici, 60455-970 Fortaleza, Ceará, Brazil

<sup>2</sup> Institute of Chemistry, Federal University of Rio Grande do Norte, 59072-970, Natal, RN, Brazil

<sup>3</sup> Federal Institute of Ceará – Crateús Campus, 63708-260, Crateús – CE, Brazil.

<sup>4</sup> Institute of Engineering and Sustainable Development, University of International Integration Lusophone African-Brazilian, 62785-000, Acarape, Ceará, Brazil

<sup>5</sup> Department of Chemical Engineering, Federal University of Ceará, Campus do Pici, 60455-760 Fortaleza, Ceará, Brazil

<sup>6</sup> Department of Chemical Engineering, Federal University of Rio Grande do Norte, Campus Central, 59078-970 Natal, Rio Grande do Norte, Brazil

<sup>7</sup> Department of Biophysics, Institute of Biosciences, Federal University of Rio Grande do Sul, Porto Alegre, Rio Grande do Sul, 91501-970, Brazil

## Table of contents

### Physical and spectroscopic data

|                                                            |     |
|------------------------------------------------------------|-----|
| 1-(2,6-dimethylphenoxy)-propan-2-one ( <b>3a</b> )         | S4  |
| 1-(2,4-dimethylphenoxy)propan-2-one ( <b>3b</b> )          | S7  |
| 1-(2-methylphenoxy)-propan-2-one ( <b>3c</b> )             | S10 |
| 1-(naphthalen-1-yloxy)propan-2-one ( <b>3d</b> )           | S13 |
| 1-(2,6-dimethylphenoxy)propan-2-ol ( <b>4a</b> )           | S16 |
| 1-(2,4-dimethylphenoxy)propan-2-ol ( <b>4b</b> )           | S19 |
| 1-(2-methylphenoxy)propan-2-ol ( <b>4c</b> ):              | S22 |
| (naphthalen-1-yloxy)propan-2-ol ( <b>4d</b> ):             | S25 |
| 1-(2,6-dimethylphenoxy)propan-2-yl acetate ( <b>5a</b> ):  | S28 |
| 1-(2,4-dimethylphenoxy)propan-2-yl acetate ( <b>5b</b> ):  | S31 |
| 1-( <i>o</i> -toliloxyl)propan-2-yl acetate ( <b>5c</b> ): | S34 |
| 1-(naphthalen-1-yloxy)propan-2-yl acetate ( <b>5d</b> ):   | S37 |

### Spectroscopic data of Mosher Derivatives Esters (ED)

|                    |     |
|--------------------|-----|
| ( <i>R</i> )-ED-4b | S40 |
| ( <i>S</i> )-ED-4b | S41 |
| ( <i>R</i> )-ED-4c | S42 |
| ( <i>S</i> )-ED-4c | S43 |
| ( <i>R</i> )-ED-4d | S44 |
| ( <i>S</i> )-ED-4d | S45 |

### Chromatograms of alcohols 4a-d and acetates 5a-d

|                                                                                                                                                                                                                                                  |     |
|--------------------------------------------------------------------------------------------------------------------------------------------------------------------------------------------------------------------------------------------------|-----|
| Chromatogram obtained by GC from <i>rac</i> -4a                                                                                                                                                                                                  | S46 |
| Chromatogram obtained by GC from <i>rac</i> -5a                                                                                                                                                                                                  | S46 |
| Chromatogram obtained by GC from ( <i>R</i> )-4a and ( <i>S</i> )-5a after enzymatic hydrolysis of acetate <i>rac</i> -5a in the presence of TLL immobilized on Immobead 150, using acetonitrile as co-solvent                                   | S47 |
| Chromatogram obtained by HPLC from <i>rac</i> -4b                                                                                                                                                                                                | S47 |
| Chromatogram obtained by HPLC from <i>rac</i> -5b                                                                                                                                                                                                | S48 |
| Chromatogram obtained by HPLC from ( <i>S</i> )-5b and ( <i>R</i> )-4b after enzymatic hydrolysis of acetate <i>rac</i> -5b in the presence of TLL immobilized on Immobead 150, using acetonitrile as co-solvent                                 | S48 |
| Chromatogram obtained by GC from <i>rac</i> -4c                                                                                                                                                                                                  | S49 |
| Chromatogram obtained by GC from <i>rac</i> -5c                                                                                                                                                                                                  | S49 |
| Chromatogram obtained by GC from ( <i>S</i> )-4c, ( <i>R</i> )-4c, ( <i>S</i> )-5c and ( <i>R</i> )-5c after enzymatic hydrolysis of acetate <i>rac</i> -5c in the presence of TLL immobilized on Immobead 150, using acetonitrile as co-solvent | S50 |
| Chromatogram obtained by GC from ( <i>S</i> )-4c, ( <i>R</i> )-4c and ( <i>S</i> )-5c after enzymatic hydrolysis of acetate <i>rac</i> -5c in the presence of lipase from <i>P. fluorescens</i> in the absence of co-solvent                     | S50 |
| Chromatogram obtained by HPLC from <i>rac</i> -4d                                                                                                                                                                                                | S51 |
| Chromatogram obtained by HPLC from <i>rac</i> -5d                                                                                                                                                                                                | S51 |

Chromatogram obtained by HPLC from (*R*)-**5d**, (*S*)-**5d** and (*R*)-**4d** **S52**  
after enzymatic hydrolysis of acetate *rac*-**5d** in the presence of TLL  
immobilized on Immobead 150, using acetonitrile as co-solvent

### Physical and spectroscopic data

#### Physical and spectroscopic data of 1-(2,6-dimethylphenoxy)-propan-2-one (3a)

Oil.  $R_f$  (20% EtOAc/ Hexane): 0.54.  $^1\text{H}$  NMR ( $\text{CDCl}_3$ , 300 MHz):  $\delta$  (ppm) 2.25 (s, 3H); 2.36 (s, 6H); 4.35 (s, 2H); 6.96-7.03 (m, 3H).  $^{13}\text{C}$  NMR (75 MHz,  $\text{CDCl}_3$ ):  $\delta$  (ppm) 16.41 (2  $\text{CH}_3$ ); 26.78 ( $\text{CH}_3$ ); 76.81 ( $\text{CH}_2$ ); 124.65 (CH); 129.25 (2 CH); 130.72 (2 C); 155.18 (C); 205.68 (C).

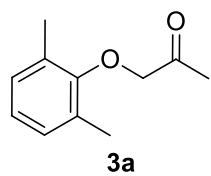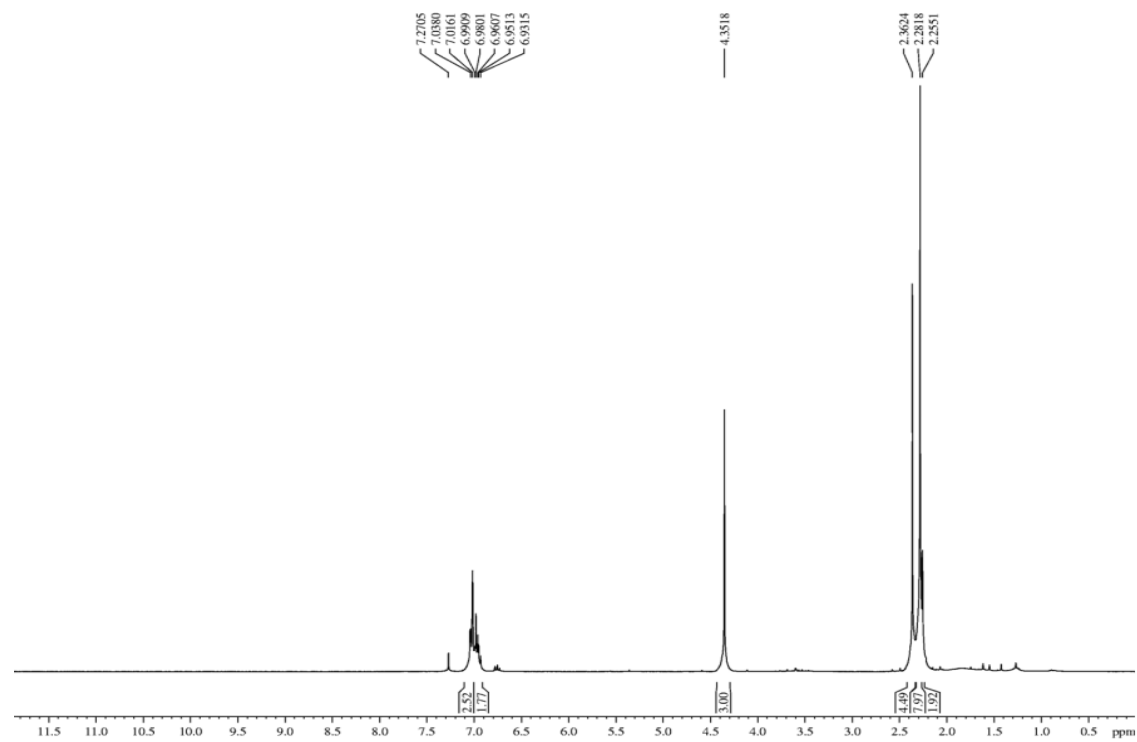

**Figure S1.** NMR  $^1\text{H}$  of **3a** (300 MHz,  $\text{CDCl}_3$ ).

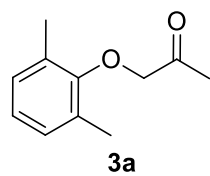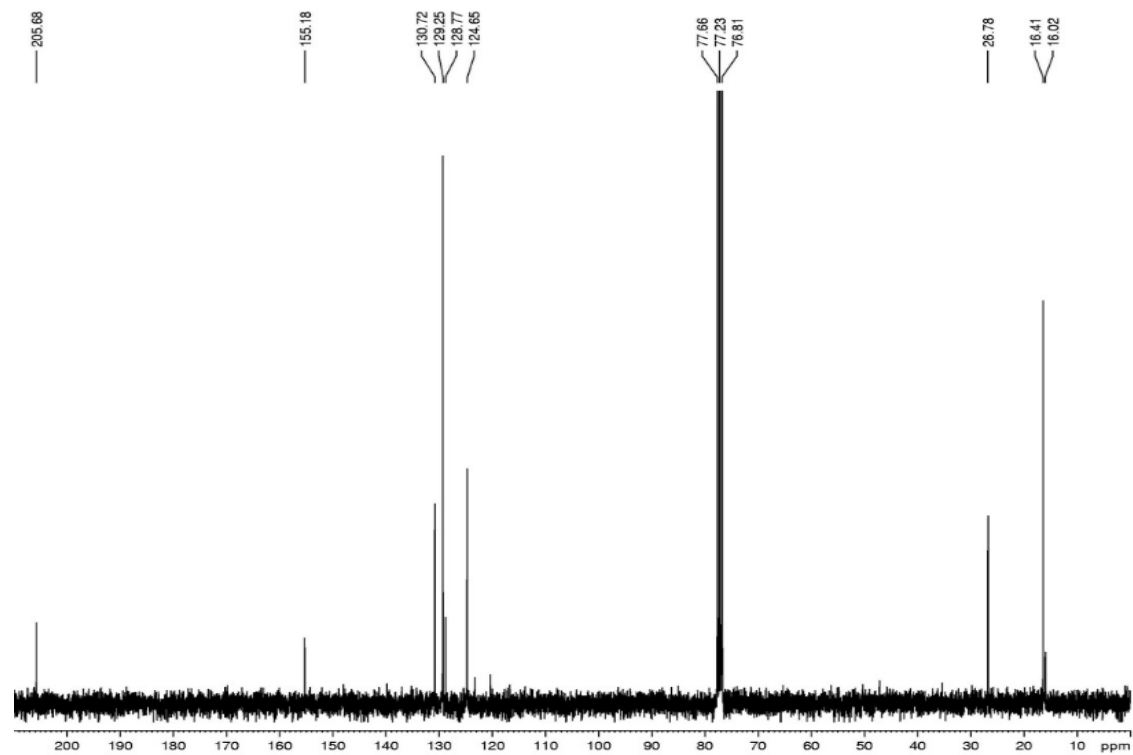

**Figure S2.** NMR  $^{13}\text{C}$  of **3a** (75 MHz,  $\text{CDCl}_3$ ).

**Physical and spectroscopic data of 1-(2,4-dimethylphenoxy)propan-2-one (3b)**

Yellow oil.  $R_f$  (20% EtOAc/ Hexane): 0.55.  $^1\text{H}$  NMR ( $\text{CDCl}_3$ , 300 MHz):  $\delta$  (ppm) 2.27 (s, 3H); 2.28 (s, 3H); 2.31 (s, 3H); 4.48 (s, 2H); 6.55 (d,  $J = 6$  Hz, 1H); 6.95 (m, 2H).  $^{13}\text{C}$  BB NMR (75 MHz,  $\text{CDCl}_3$ ):  $\delta$  (ppm) 16.37 ( $\text{CH}_3$ ); 20.61 ( $\text{CH}_3$ ); 26.85 ( $\text{CH}_3$ ); 73.61 ( $\text{CH}_2$ ); 111.02 (CH); 126.81 (C); 127.26 (CH); 130.85 (C); 132.11 (CH); 154.03 (C); 206.93 (C).

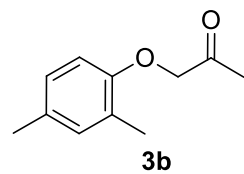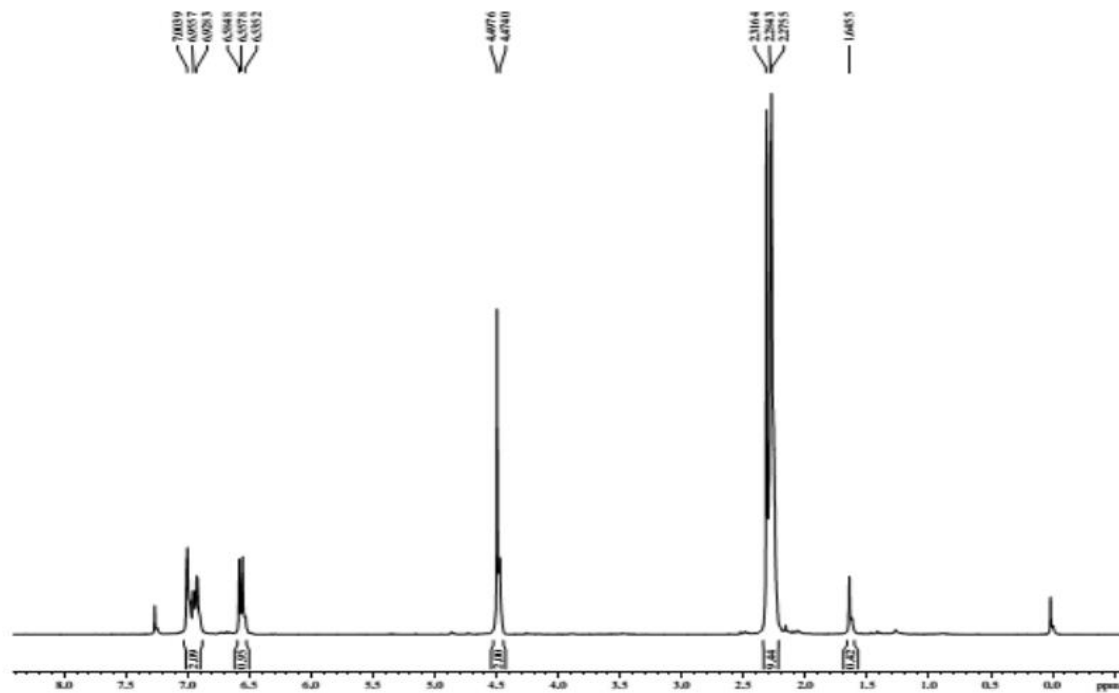

**Figure S3.** NMR <sup>1</sup>H of **3b** (300 MHz, CDCl<sub>3</sub>).



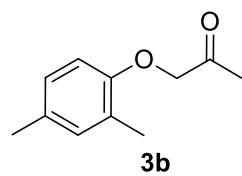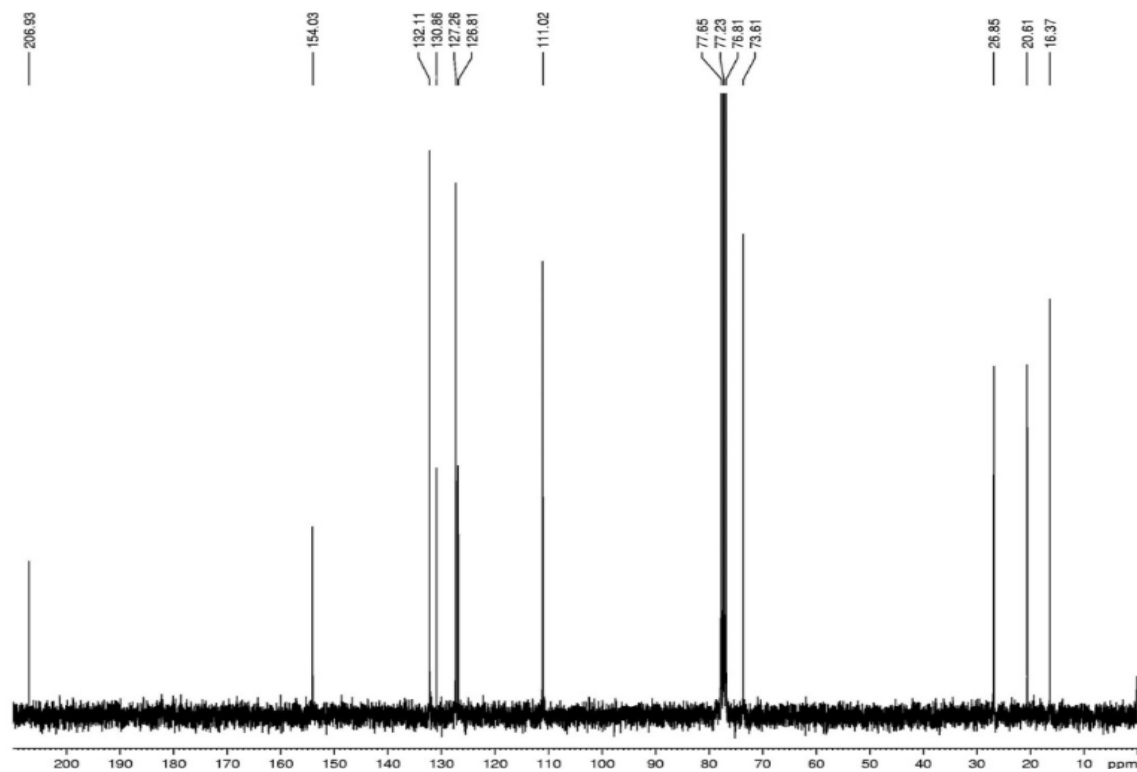

**Figure S4.** NMR  $^{13}\text{C}$  of **3b** (75 MHz,  $\text{CDCl}_3$ ).

**Physical and spectroscopic data of 1-(2-methylphenoxy)-propan-2-one (3c):**

Yellow oil.  $R_f$  (10%Hexane/ $\text{CHCl}_3$ ): 0.5.  $^1\text{H}$  NMR ( $\text{CDCl}_3$ , 300 MHz):  $\delta$  (ppm) 2.32 (s, 3H); 2.33 (s, 3H); 4.53 (s, 2H); 6.67 (d,  $J = 8$  Hz, 1H); 6.92 (t,  $J = 7.3$  Hz 1H); 7.13-7.20 (m, 2H).  $^{13}\text{C}$  NMR (75 MHz,  $\text{CDCl}_3$ ):  $\delta$  (ppm) 16.46 ( $\text{CH}_3$ ); 26.88 ( $\text{CH}_3$ ); 73.39 ( $\text{CH}_2$ ); 111.03 (CH); 121.63 (CH); 127.14 (CH); 131.30 (C); 156.11 (C); 206.64 (C).

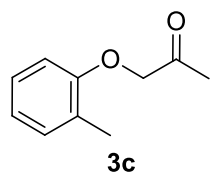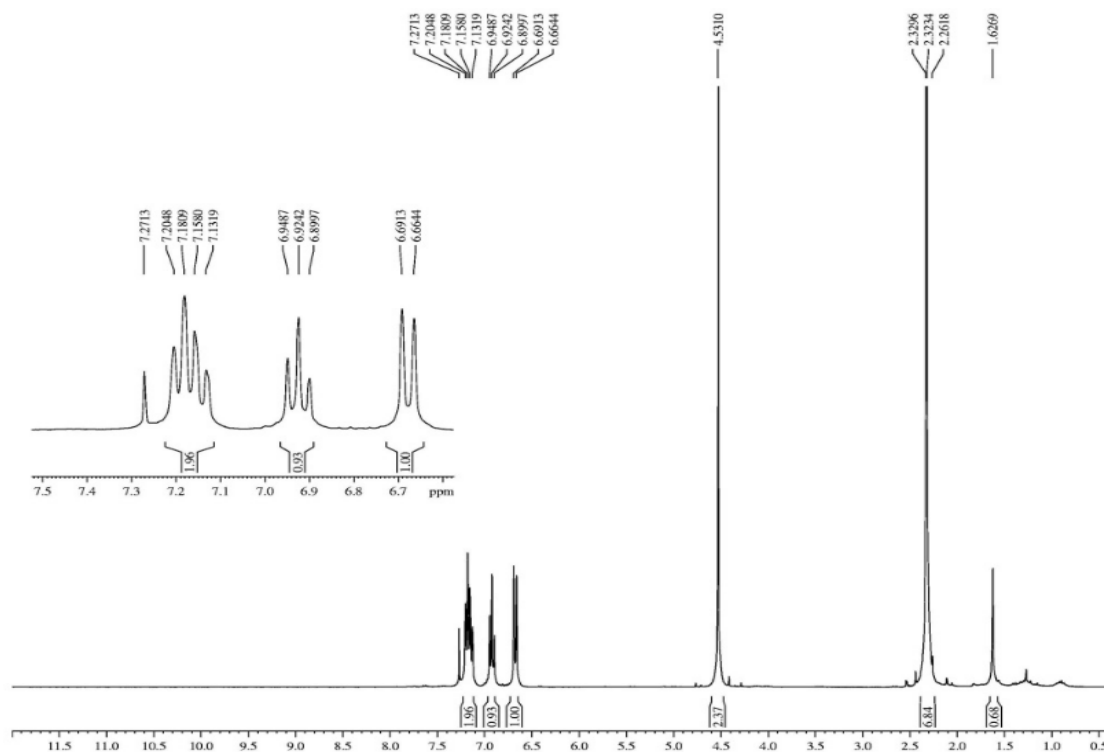

**Figure S5.** NMR <sup>1</sup>H of **3c** (300 MHz, CDCl<sub>3</sub>)

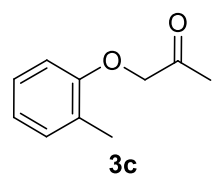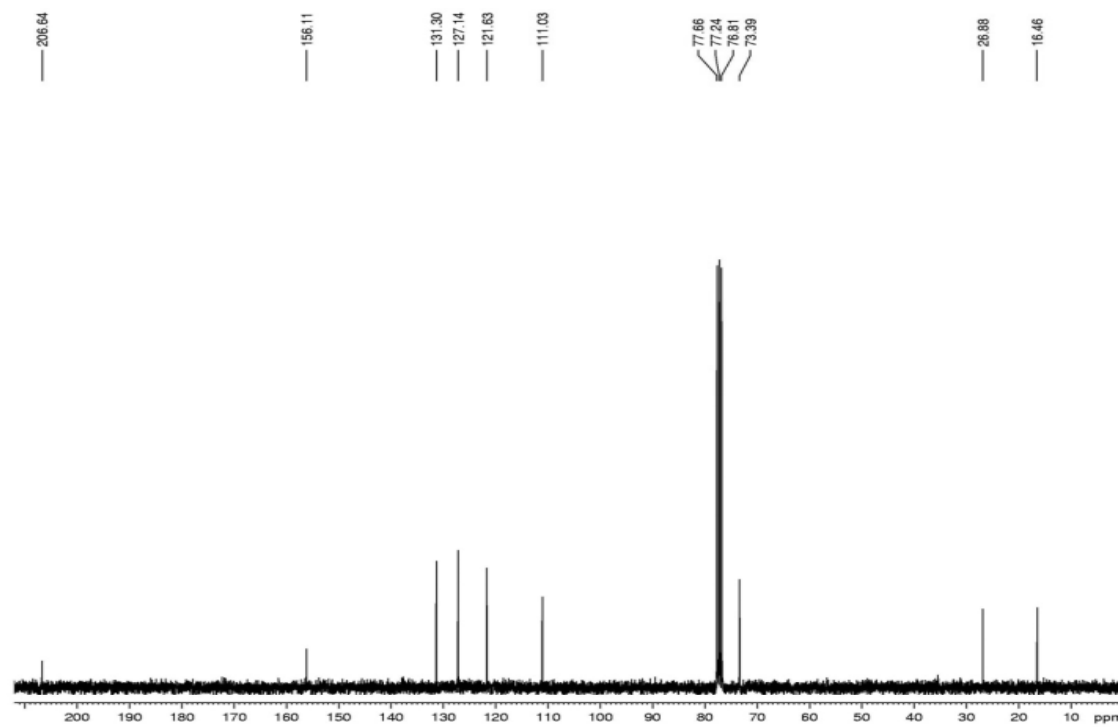

**Figure S6.** NMR <sup>13</sup>C of **3c** (75 MHz, CDCl<sub>3</sub>)

**Physical and spectroscopic data of 1-(naphthalen-1-yloxy)propan-2-one (3d):**

Brown oil.  $R_f$  (20% EtOAc/Hexane): 0.6.  $^1\text{H}$  NMR ( $\text{CDCl}_3$ , 300 MHz):  $\delta$  (ppm) 2.41(s, 3H); 4.71 (s, 2H); 6.69 (d,  $J = 7.6$  Hz, 1H); 7.36 (t,  $J = 8.1$  Hz, 1H); 7.48 (s, 1H); 7.53-8.34 (m, 4H).  $^{13}\text{C}$  NMR (75 MHz,  $\text{CDCl}_3$ ):  $\delta$  (ppm) 27.04 ( $\text{CH}_3$ ); 73.5 ( $\text{CH}_2$ ); 105.08 (CH); 121.65 (CH); 122.05 (CH); 125.62 (C); 125.83 (2 CH); 126.93 (CH); 127.81 (CH); 134.87 (C); 153.0 (C); 206.32 (C).

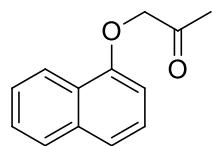

**3d**

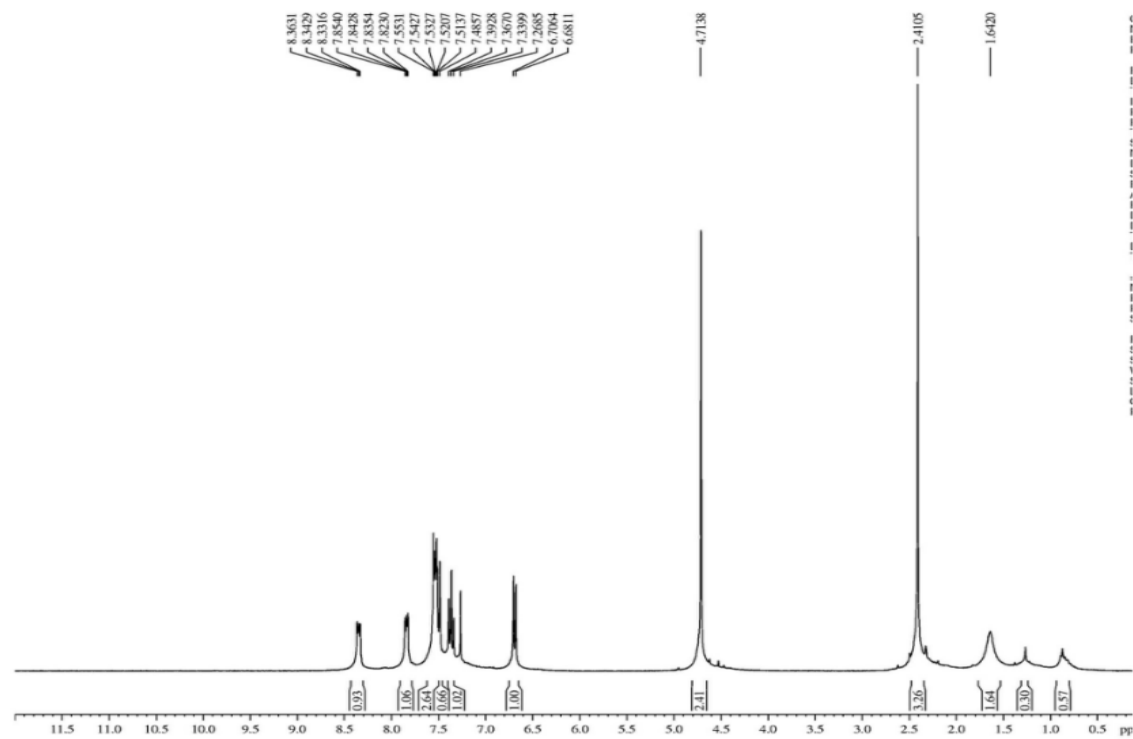

**Figure S7.** NMR  $^1\text{H}$  of **3d** (300 MHz,  $\text{CDCl}_3$ )

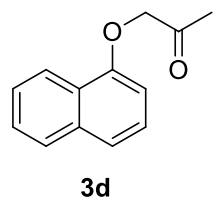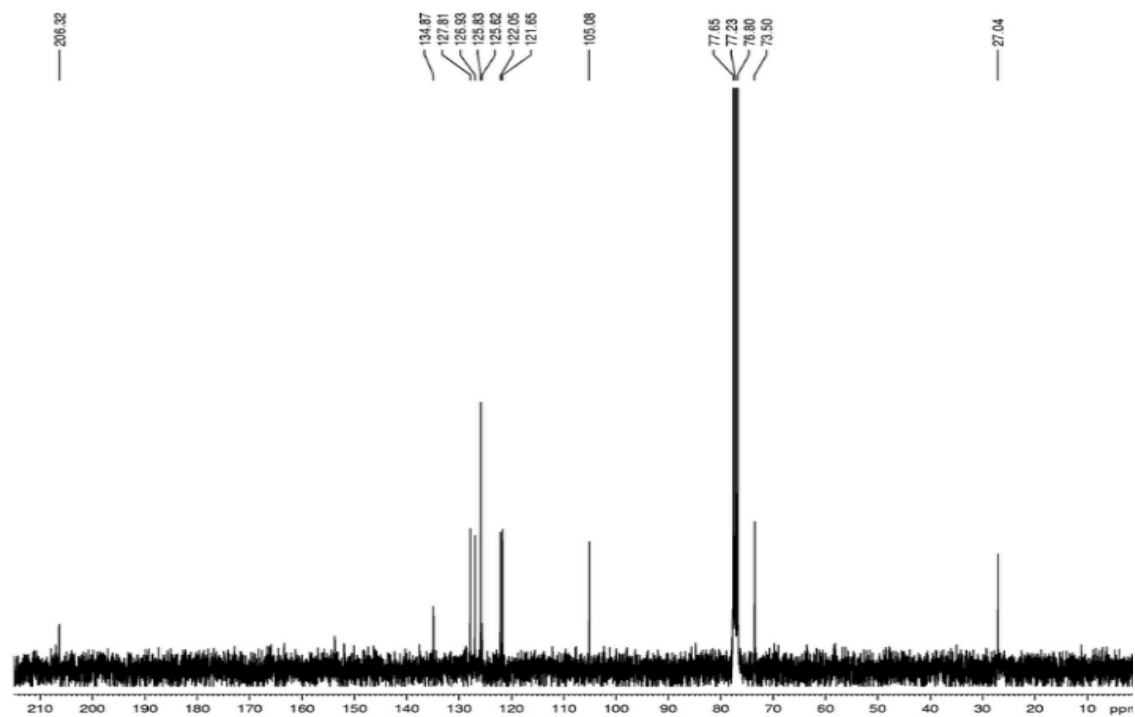

**Figure S8.** NMR <sup>13</sup>C of **3d** (75 MHz, CDCl<sub>3</sub>)

**Physical and spectroscopic data of 1-(2,6-dimethylphenoxy)propan-2-ol (4a):**

Yellow oil.  $R_f$  (20%EtOAc/Hexane): 0.36.  $^1\text{H}$  NMR ( $\text{CDCl}_3$ , 300 MHz):  $\delta$  (ppm) 1.26 (d,  $J = 6.4$  Hz, 3H); 2.28 (s, 6H); 3.68 (ddd,  $J = 27.5, 9$  and  $7$  Hz, 2H); 4.18-4.24 (m, 1H); 6.9-7.02 (m, 3H).  $^{13}\text{C}$  NMR (75 MHz,  $\text{CDCl}_3$ ):  $\delta$  (ppm) 16.52 ( $\text{CH}_3$ ); 18.81 ( $\text{CH}_3$ ); 67.33 (CH); 77.18 ( $\text{CH}_2$ ); 124.28 (CH); 129.18 (CH); 130.97 (C); 155.41 (C). For (*R*)-**4a**:  $[\alpha]_{\text{D}}^{20} + 1.46$  ( $c$  8.0,  $\text{CHCl}_3$ ) for >99% *ee* of the enantiomer *R*. Lit.  $[\alpha]_{\text{D}}^{20} + 0.9$  ( $c$  5.5,  $\text{CHCl}_3$ ) for 98% *ee* of the enantiomer *R* [25].



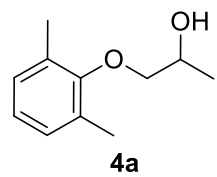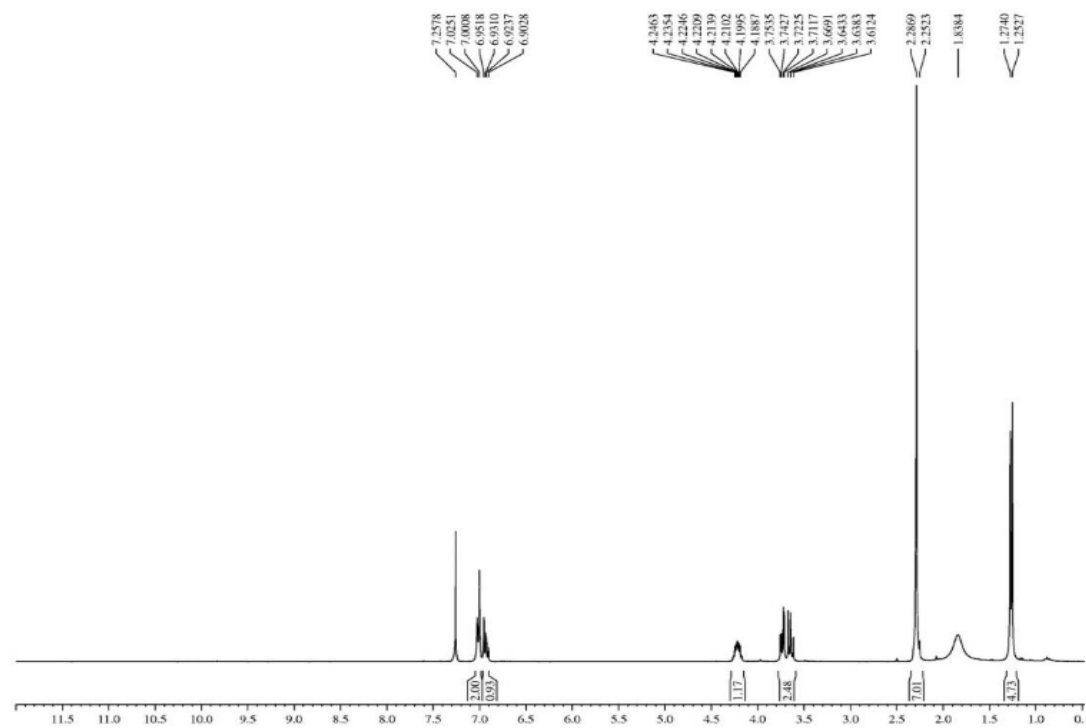

**Figure S9.** NMR <sup>1</sup>H of *rac*-**4a** (300 MHz, CDCl<sub>3</sub>)

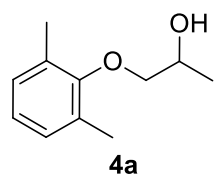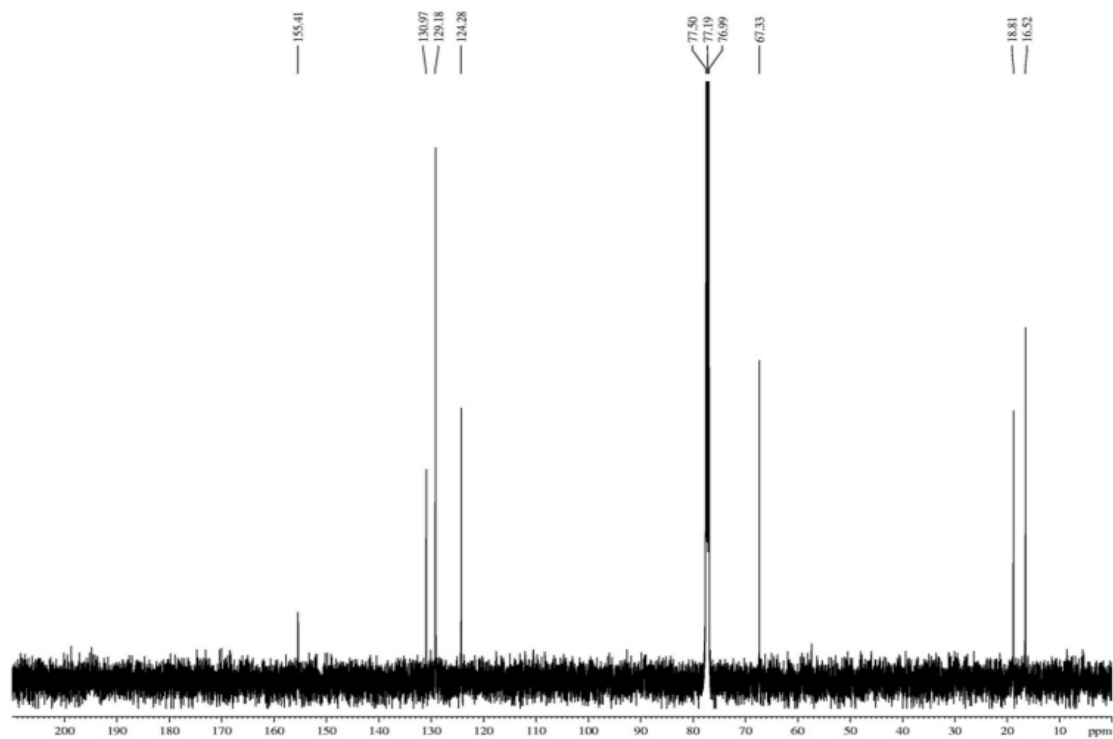

**Figure S10.** NMR  $^{13}\text{C}$  of *rac*-**4a** (75 MHz,  $\text{CDCl}_3$ )

**Physical and spectroscopic data of 1-(2,4-dimethylphenoxy)propan-2-ol (4b):**

Yellow oil.  $R_f$  (20% Hexane/ EtOAc): 0.43.  $^1\text{H}$  NMR ( $\text{CDCl}_3$ , 300 MHz):  $\delta$  (ppm) 1.31 (d,  $J = 3.9$  Hz, 3H); 2.23 (s, 3H); 2.27 (s, 3H); 3.93 (dd,  $J = 3$  and 3 Hz, 1H), 3.78 (dd,  $J = 3$  and 3 Hz 1H); 4.21 (m, 1H); 6.73 (d,  $J = 6$  Hz, 1H); 6.96 (m, 2H).  $^{13}\text{C}$  NMR (75 MHz,  $\text{CDCl}_3$ ):  $\delta$  (ppm) 16.35 ( $\text{CH}_3$ ); 20.63 ( $\text{CH}_3$ ); 19.0 ( $\text{CH}_3$ ); 66.7 (CH); 73.79 ( $\text{CH}_2$ ); 111.63 (CH); 126.72 (C); 127.23 (CH); 130.30 (C); 131.82 (CH); 154.71 (C). For (*R*)-**4b**:  $[\alpha]_{\text{D}}^{20} +30.5$  ( $c$  5.0,  $\text{CH}_2\text{Cl}_2$ ) for >99% *ee*.

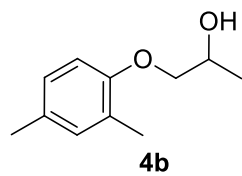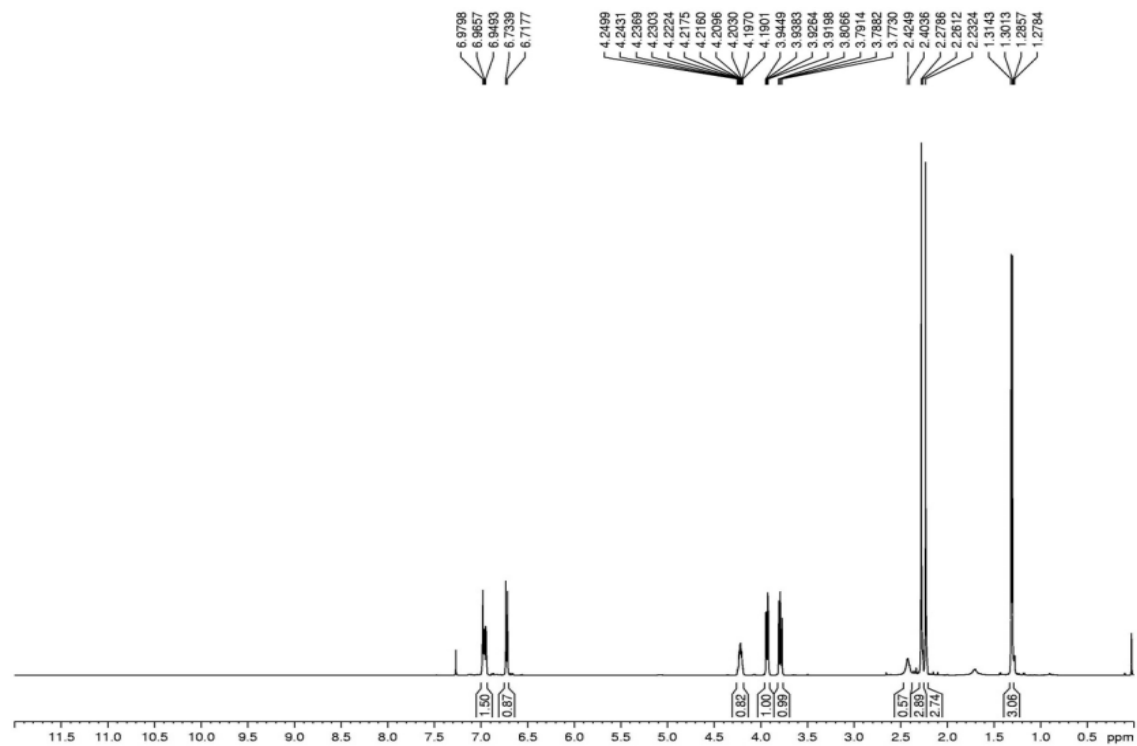

**Figure S11.** NMR  $^1\text{H}$  of *rac*-**4b** (300 MHz,  $\text{CDCl}_3$ )

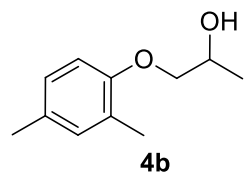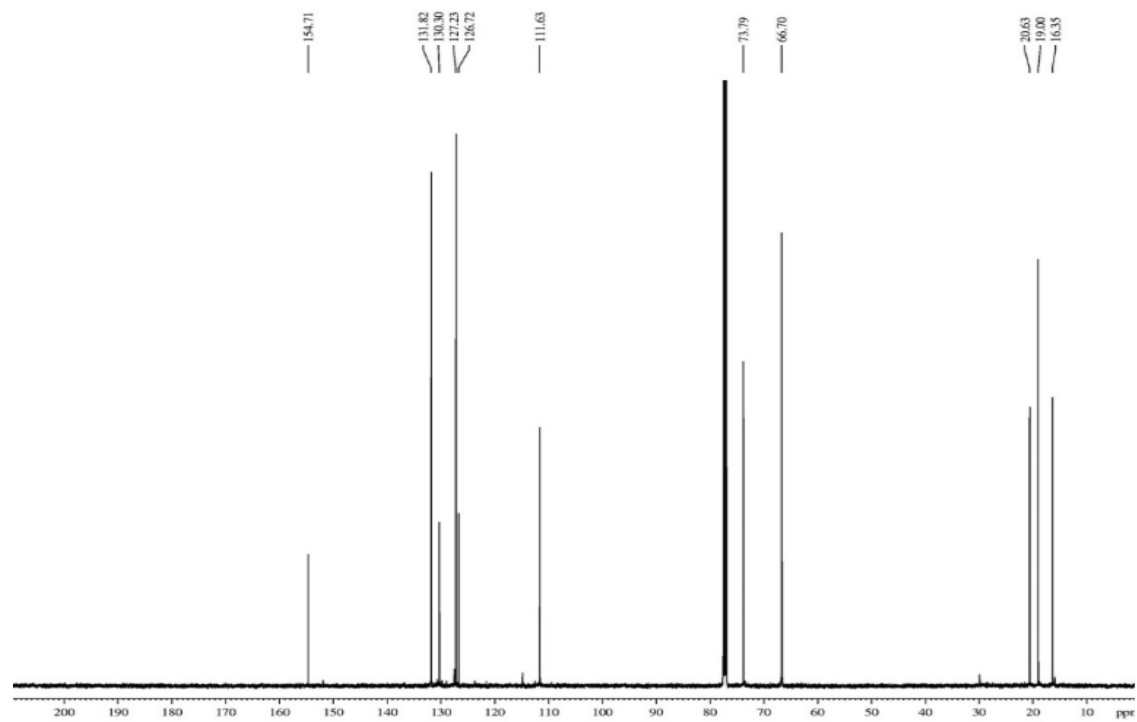

**Figure S12.** NMR  $^{13}\text{C}$  of *rac*-**4b** (75 MHz,  $\text{CDCl}_3$ )

**Physical and spectroscopic data of 1-(2-methylphenoxy)propan-2-ol (4c):**

Yellow oil.  $R_f$  (10% Hexane:CHCl<sub>3</sub>): 0.4. <sup>1</sup>H NMR (CDCl<sub>3</sub>, 300 MHz):  $\delta$  (ppm) 1.31(d,  $J$  = 6 Hz, 3H); 2.26 (s, 3H); 3.81 (dd,  $J$  = 6 and 3 Hz, 1H); 3.96 (dd,  $J$  = 6 and 3 Hz, 1H); 4.22 (m, 1H); 6.82 (t,  $J$  = 9 and 3 Hz, 1H); 6.89 (t,  $J$  = 15 and 9 Hz, 1H); 7.16 (m, 2H). <sup>13</sup>C NMR (75 MHz, CDCl<sub>3</sub>):  $\delta$  (ppm) 16.40 (CH<sub>3</sub>); 19.06 (CH<sub>3</sub>); 66.69 (CH); 73.56 (CH<sub>2</sub>); 111.53 (CH); 121.08 (CH); 126.98 (C); 127.07 (CH); 131.01 (CH); 156.82 (C). For (R)-**4c**:  $[\alpha]_D^{20}$  -9.8 ( $c$  5.0, CH<sub>2</sub>Cl<sub>2</sub>) for 98% *ee*.

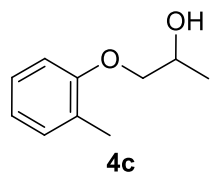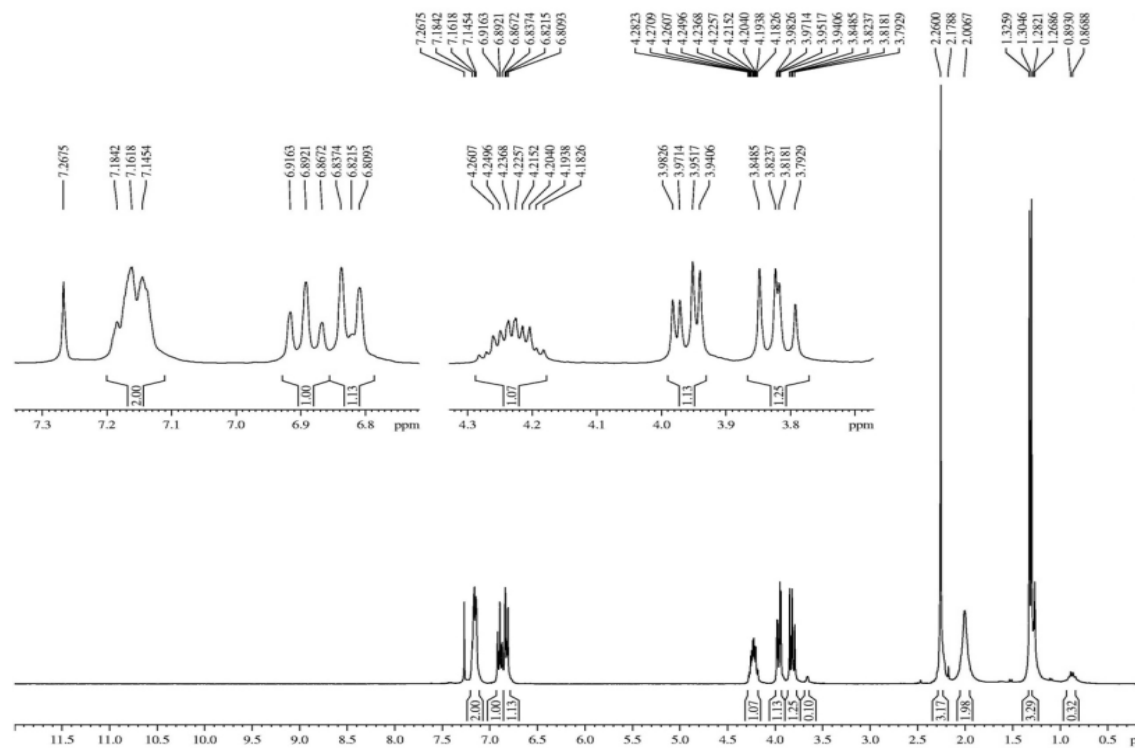

**Figure S13.** NMR  $^1\text{H}$  of *rac*-**4c** (300 MHz,  $\text{CDCl}_3$ ).

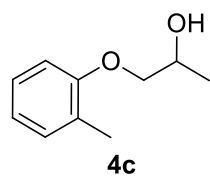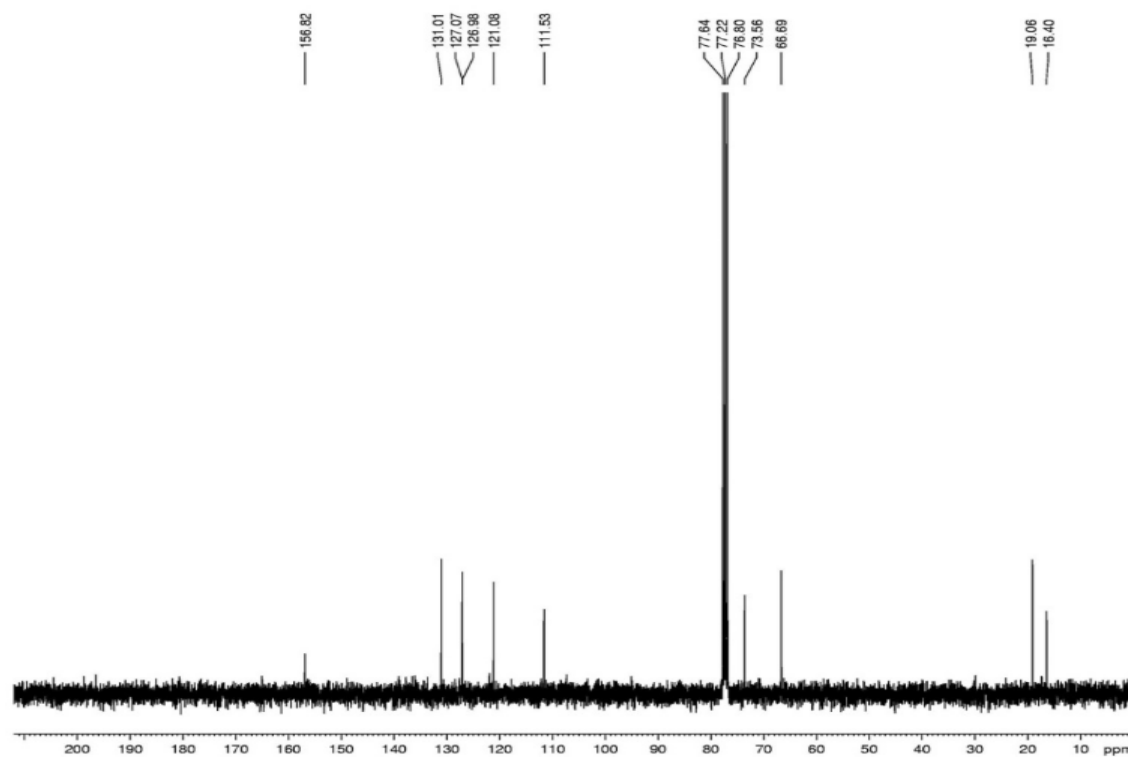

**Figure S14.** NMR  $^{13}\text{C}$  of *rac*-**4c** (75 MHz,  $\text{CDCl}_3$ )



**Physical and spectroscopic data of 1-(naphthalen-1-yloxy)propan-2-ol (**4d**):**

White solid.  $R_f$  (20% EtOAc/ Hexane): 0.4. m.p.: 62.8–64.5 °C.  $^1\text{H}$  NMR ( $\text{CDCl}_3$ , 300 MHz):  $\delta$  (ppm) 1.41 (d,  $J = 6\text{ Hz}$ , 3H); 4.06 (m, 2H); 4.36 (m, 1H); 6.82 (d,  $J = 9\text{ Hz}$ , 2H); 7.40 (t,  $J = 18$  and  $9\text{ Hz}$ , 1H); 7.53 (m, 2H); 7.86 (m, 1H); 8.32 (m, 1H).  $^{13}\text{C}$  NMR (75 MHz,  $\text{CDCl}_3$ ):  $\delta$  (ppm) 19.24 ( $\text{CH}_3$ ); 66.56 (CH); 73.60 ( $\text{CH}_2$ ); 105.19 (CH); 120.82 (CH); 121.88 (CH); 125.43 (CH); 125.69 (C); 125.95 (CH); 126.58 (C); 127.70 (CH); 134.87 (C); 154.37 (C). For (*R*)-**4d**:  $[\alpha]_{\text{D}}^{20} +16.0$  ( $c$  5.0,  $\text{CH}_2\text{Cl}_2$ ) for >99% *ee*.

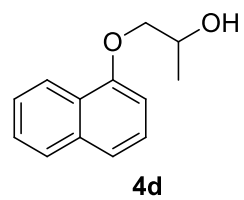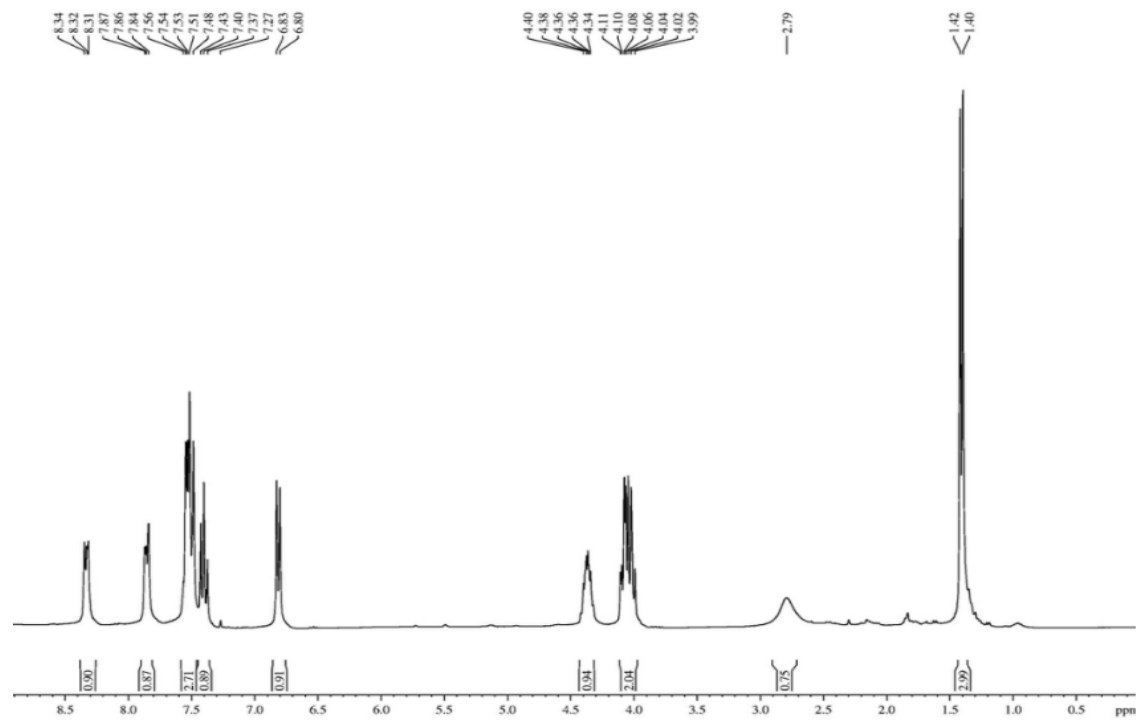

**Figure S15.** NMR <sup>1</sup>H of *rac*-**4d** (300 MHz, CDCl<sub>3</sub>)

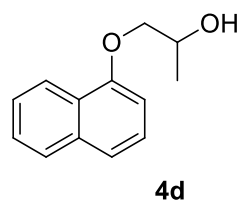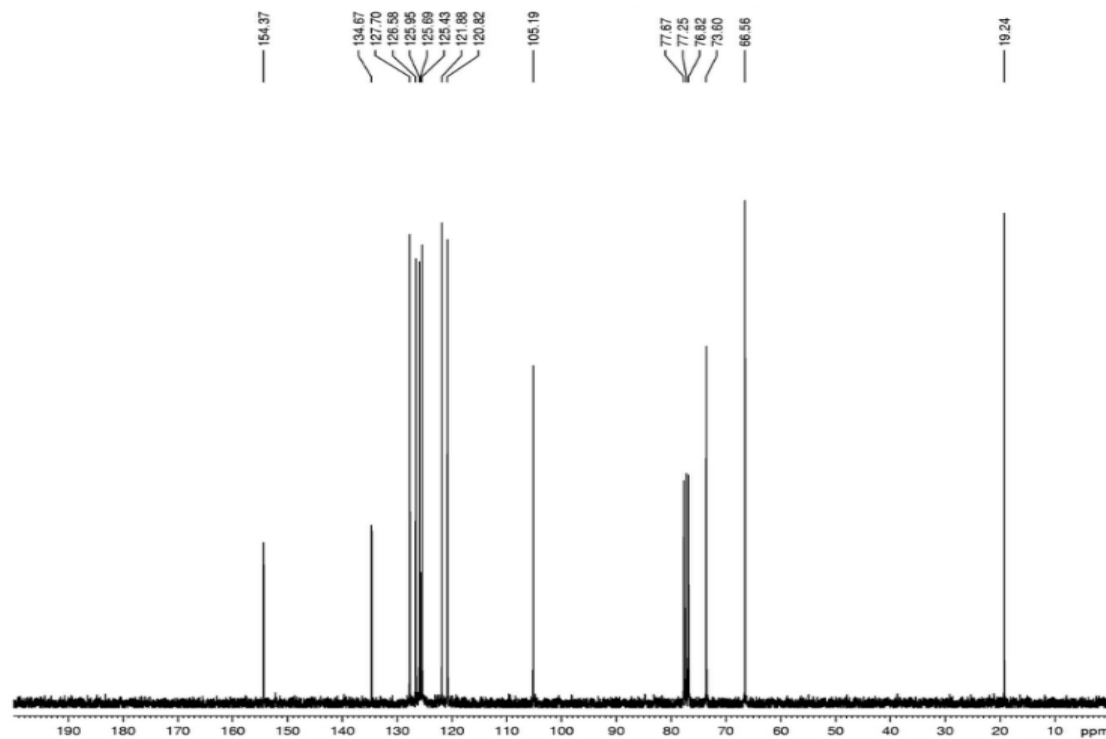

**Figure S16.** NMR <sup>13</sup>C of *rac*-**4d** (75 MHz, CDCl<sub>3</sub>)

**Physical and spectroscopic data of 1-(2,6-dimethylphenoxy)propan-2-yl acetate (5a):**

Yellow oil.  $R_f$  (20% Hexane:CHCl<sub>3</sub>): 0.6. <sup>1</sup>H NMR (CDCl<sub>3</sub>, 300 MHz):  $\delta$  (ppm) 1.41 (d,  $J = 6.5$  Hz, 3H); 2.11 (s, 3H); 2.33 (s, 6H); 3.82 (d,  $J = 4.8$  Hz, 2H); 5.22-5.3 (m, 1H); 6.93 (dd,  $J = 8.4$  and 6.2 Hz, 1H); 7.01 (d,  $J = 7.2$  Hz, 2H). <sup>13</sup>C NMR (75 MHz, CDCl<sub>3</sub>):  $\delta$  (ppm); 16.24 (CH<sub>3</sub>); 16.73 (2 CH<sub>3</sub>); 21.36 (CH<sub>3</sub>); 69.85 (CH); 73.85 (CH<sub>2</sub>); 124.14 (CH); 129.03 (2 CH); 130.9 (2 C); 155.42 (C); 170.7 (C). For (*S*)-**5a**:  $[\alpha]_D^{20}$  -10.8 (c 8, CHCl<sub>3</sub>) for >99% *ee*.

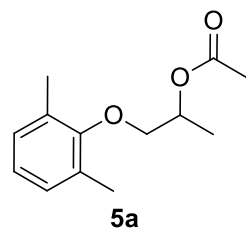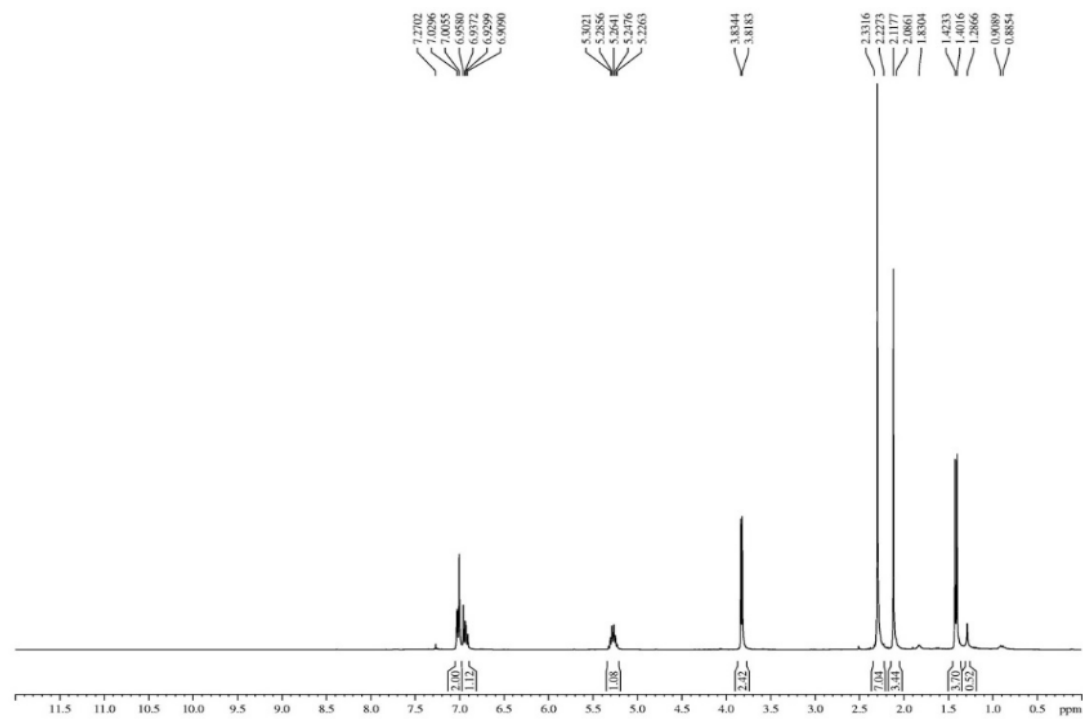

**Figure S17.** NMR  $^1\text{H}$  of *rac*-**5a** (300 MHz,  $\text{CDCl}_3$ )

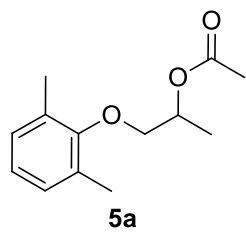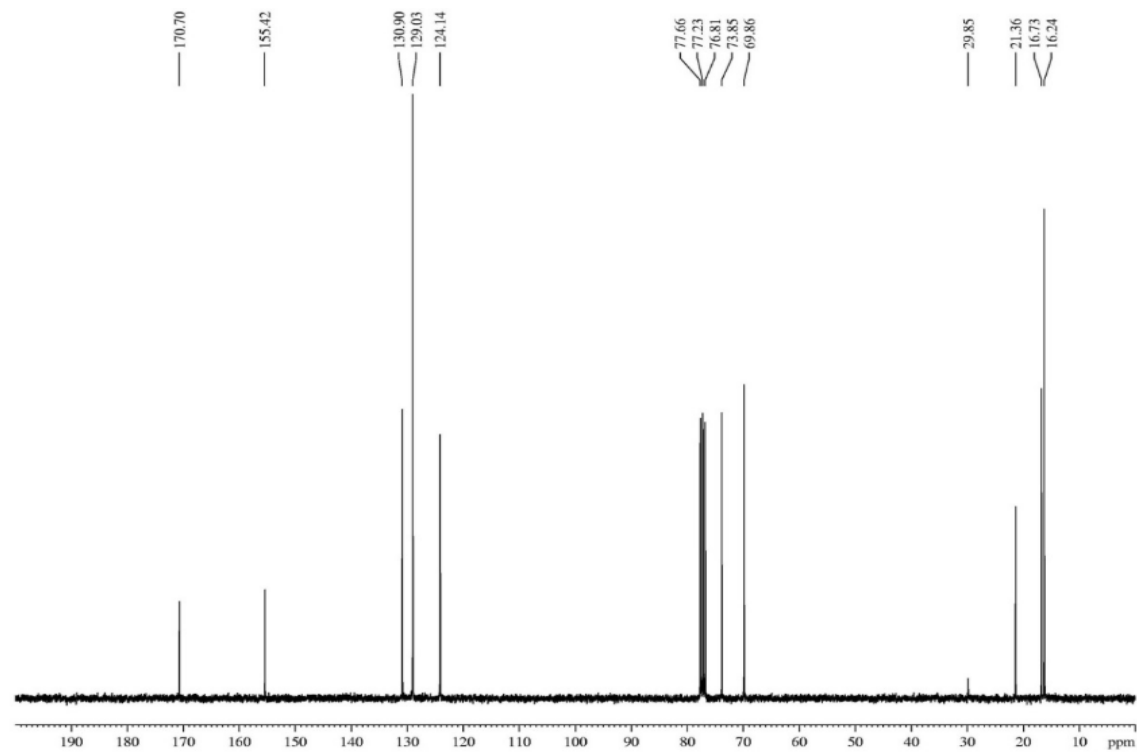

**Figure S18.** NMR  $^{13}\text{C}$  of *rac*-**5a** (75 MHz,  $\text{CDCl}_3$ )

**Physical and spectroscopic data of 1-(2,4-dimethylphenoxy)propan-2-yl acetate (5b):**

White solid.  $R_f$  (20%Hexane/ EtOAc): 0.65. m.p.: 40–41.7 °C.  $^1\text{H}$  NMR ( $\text{CDCl}_3$ , 300 MHz):  $\delta$  (ppm) 1.36 (d,  $J = 3.8$  Hz, 3H); 2.08 (s, 3H); 2.20 (s, 3H); 2.27 (s, 3H); 3.94–4.00 (m, 2H); 5.28–5.32 (m, 1H); 6.70 (d,  $J = 4.7$  Hz, 1H); 6.94–6.96 (m, 2H).  $^{13}\text{C}$  NMR (75 MHz,  $\text{CDCl}_3$ ):  $\delta$  (ppm) 16.20 ( $\text{CH}_3$ ); 16.93 ( $\text{CH}_3$ ); 20.62 ( $\text{CH}_3$ ); 21.40 ( $\text{CH}_3$ ); 69.16 (CH); 70.60 ( $\text{CH}_2$ ); 111.46 (CH); 126.98 (C); 127.11 (CH); 130.17 (C); 131.75 (CH); 154.80 (C); 170.76 (C). For (*S*)-**5b**:  $[\alpha]_{\text{D}}^{20}$  -38.8 (c 8,  $\text{CH}_2\text{Cl}_2$ ) for >99% *ee*.

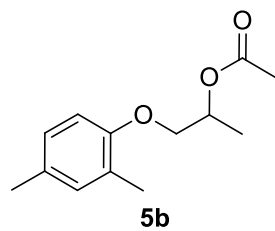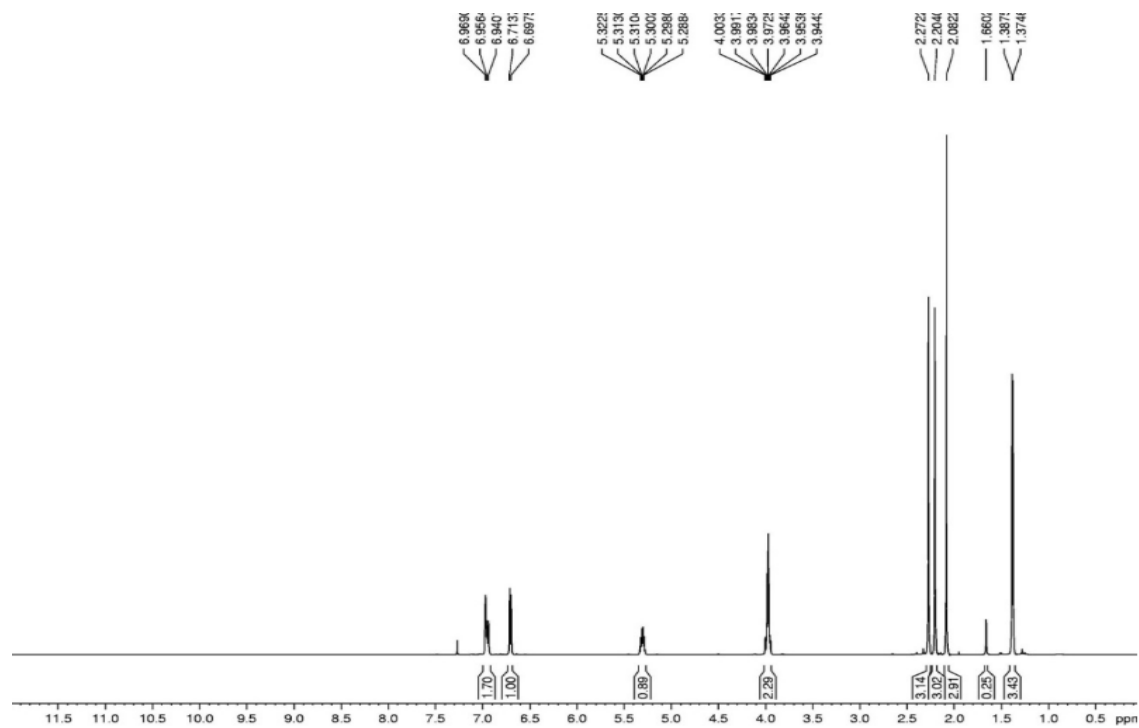

**Figure S19.** NMR  $^1\text{H}$  of *rac*-**5b** (300 MHz,  $\text{CDCl}_3$ )



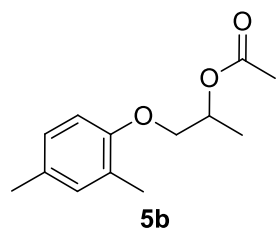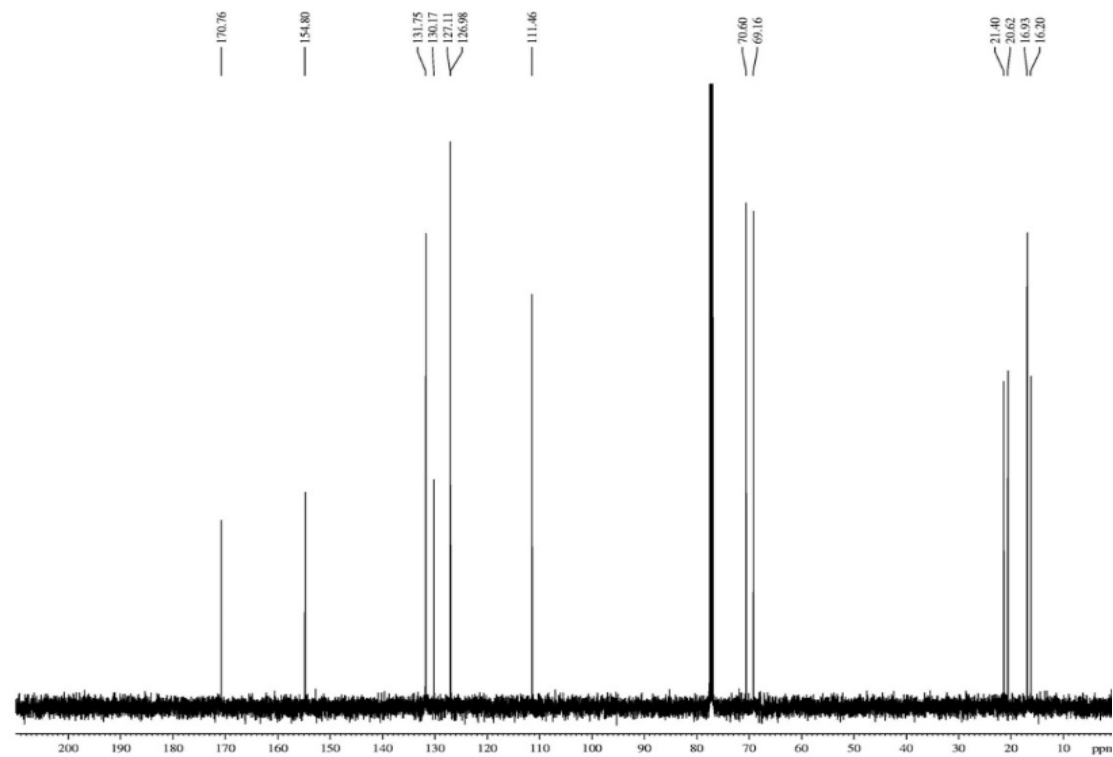

**Figure S20.** NMR  $^{13}\text{C}$  of *rac*-**5b** (75 MHz,  $\text{CDCl}_3$ )

**Physical and spectroscopic data of 1-(*o*-toliloxo)propan-2-yl acetate (**5c**):**

Yellow oil.  $R_f$  (10% Hexane/ EtOAc): 0.5.  $^1\text{H}$  NMR ( $\text{CDCl}_3$ , 300 MHz):  $\delta$  (ppm) 1.40 (d,  $J = 6$  Hz, 3H); 2.09 (s, 3H); 2.24 (s, 3H); 4.01 (t,  $J = 3$  Hz, 2H); 5.32 (m, 1H); 6.81 (d,  $J = 6$  Hz, 1H); 6.89 (t,  $J = 21$  and 6 Hz, 1H); 7.16 (m, 2H).  $^{13}\text{C}$  NMR (75 MHz,  $\text{CDCl}_3$ ):  $\delta$  (ppm) 16.23 ( $\text{CH}_3$ ); 16.88 ( $\text{CH}_3$ ); 21.33 ( $\text{CH}_3$ ); 69.14 (CH); 70.29 ( $\text{CH}_2$ ); 111.32 (CH); 120.94 (CH); 126.93 (CH); 127.18 (C); 130.90 (CH); 156.84 (C); 170.83 (C). For (*S*)-**5c**:  $[\alpha]_{\text{D}}^{20}$  -19.42 ( $c$  5,  $\text{CHCl}_3$ ) for >99% *ee*.

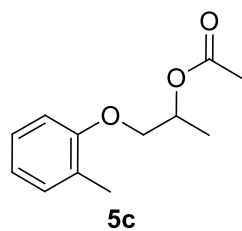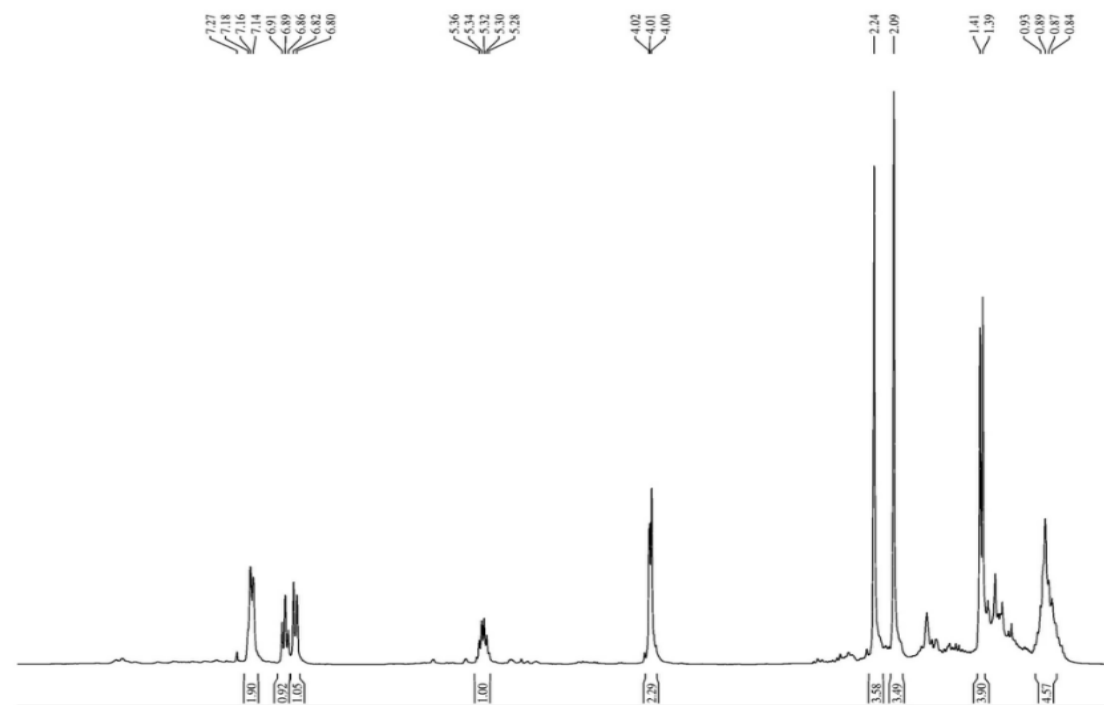

**Figure S21.** NMR <sup>1</sup>H of *rac*-**5c** (300 MHz, CDCl<sub>3</sub>)

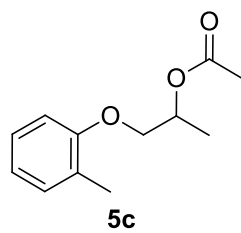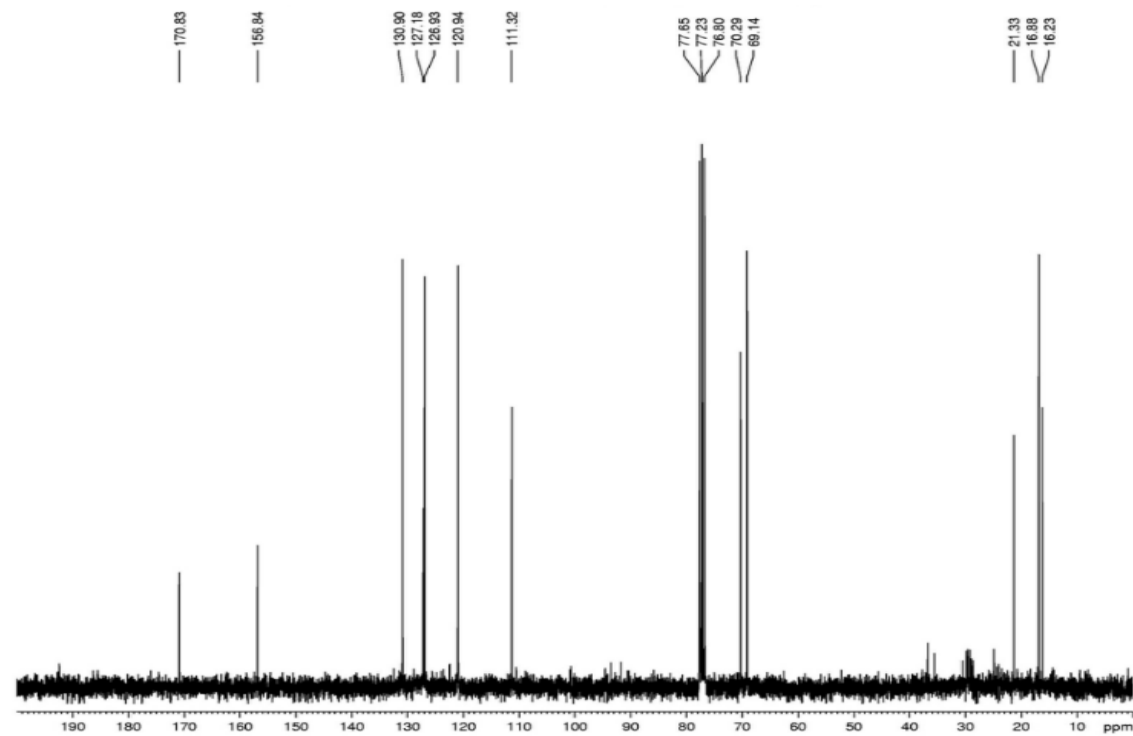

**Figure S22.** NMR  $^{13}\text{C}$  of *rac*-**5c** (75 MHz,  $\text{CDCl}_3$ )

**Physical and spectroscopic data of 1-(naphthalen-1-yloxy)propan-2-yl acetate (5d):**

White solid.  $R_f$  (20%Hexane/EtOAc): 0.5. m.p.: 55.8–56.9 °C.  $^1\text{H}$  NMR ( $\text{CDCl}_3$ , 300 MHz):  $\delta$  (ppm) 1.48 (d,  $J = 6\text{Hz}$ , 3H); 2.11 (s, 3H); 4.19 (m, 2H); 5.47 (m, H); 6.76 (d,  $J = 9\text{ Hz}$ , 1H); 7.40-8.27 (m, 6H).  $^{13}\text{C}$  NMR (75 MHz,  $\text{CDCl}_3$ ):  $\delta$  (ppm) 17.11 ( $\text{CH}_3$ ); 21.50 ( $\text{CH}_3$ ); 69.07 (CH); 70.66 ( $\text{CH}_2$ ); 105.09 (CH); 120.95 (CH); 122.25 (CH); 125.58 (CH); 125.95 (C); 125.99 (CH); 126.73 (CH); 127.70 (CH); 134.81 (C); 154.62 (C); 170.90 (C). For (*S*)-**5d**:  $[\alpha]_{\text{D}}^{20}$  -26.73 ( $c$  9,  $\text{CHCl}_3$ ) for 95% *ee*.

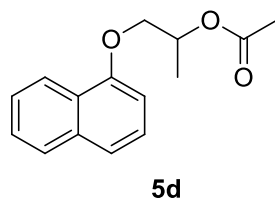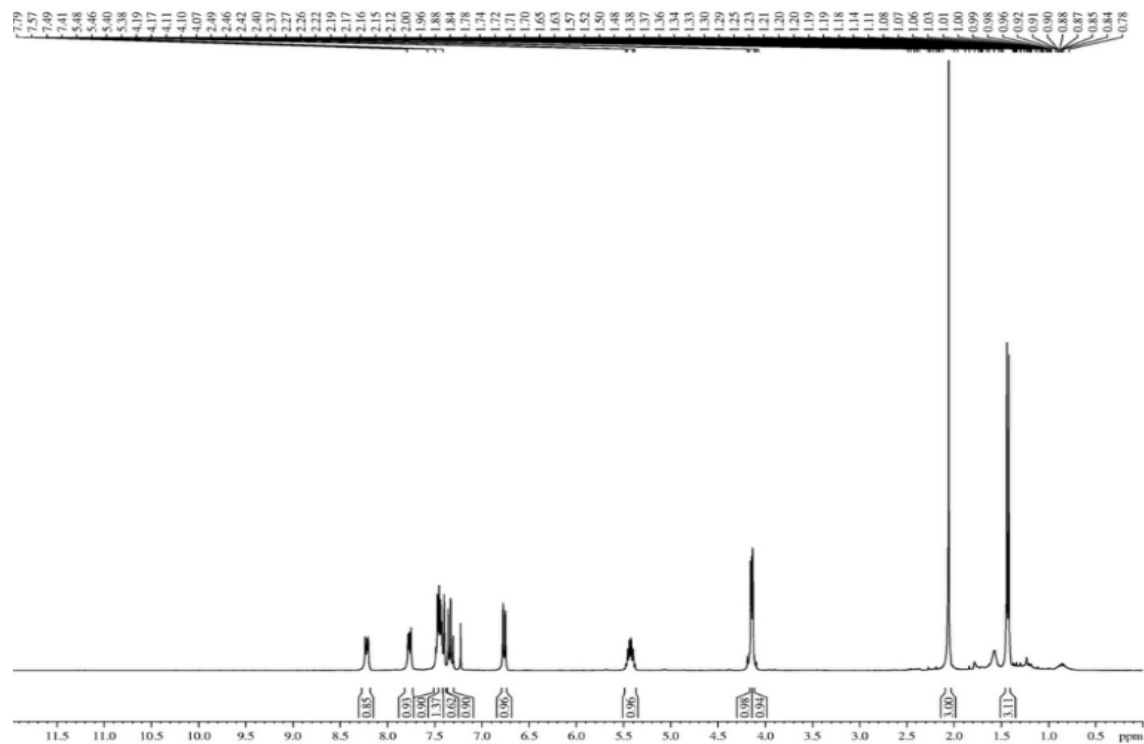

**Figure S23.** NMR <sup>1</sup>H of *rac*-**5d** (300 MHz, CDCl<sub>3</sub>)

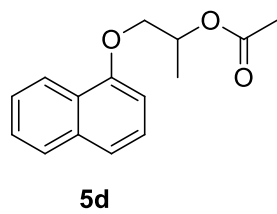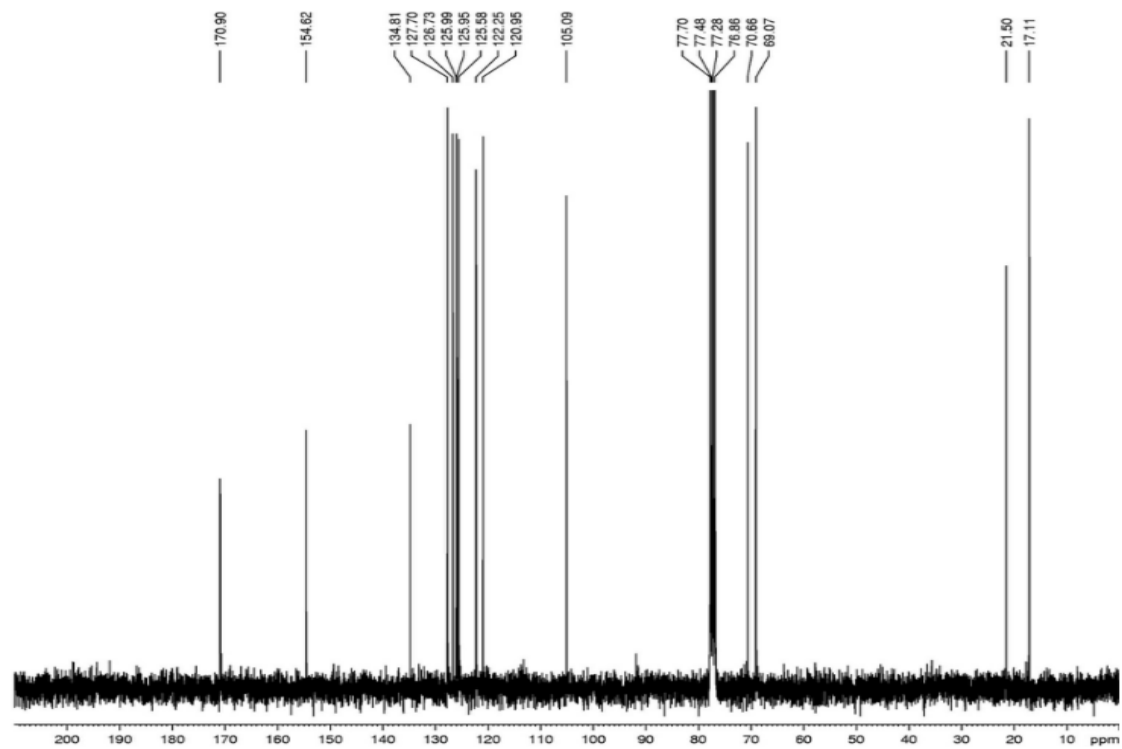

**Figure S24.** NMR <sup>13</sup>C of *rac*-**5d** (75 MHz, CDCl<sub>3</sub>)

### Spectroscopic data of (*R*)-ED-4b

$^1\text{H}$  NMR ( $\text{CDCl}_3$ , 300 MHz):  $\delta$  (ppm) 1.49 (d,  $J = 6$  Hz, 3H); 2.09 (s, 3H); 2.25 (s, 3H); 3.56 (s, 3H); 3.98 (m, 2H); 5.56 (m, 1H); 6.62 (d,  $J = 6$  Hz, 1H); 6.93 (d,  $J = 12$  Hz, 2H); 7.34 (m, 3H); 7.55 (d,  $J = 6$  Hz, 2H).

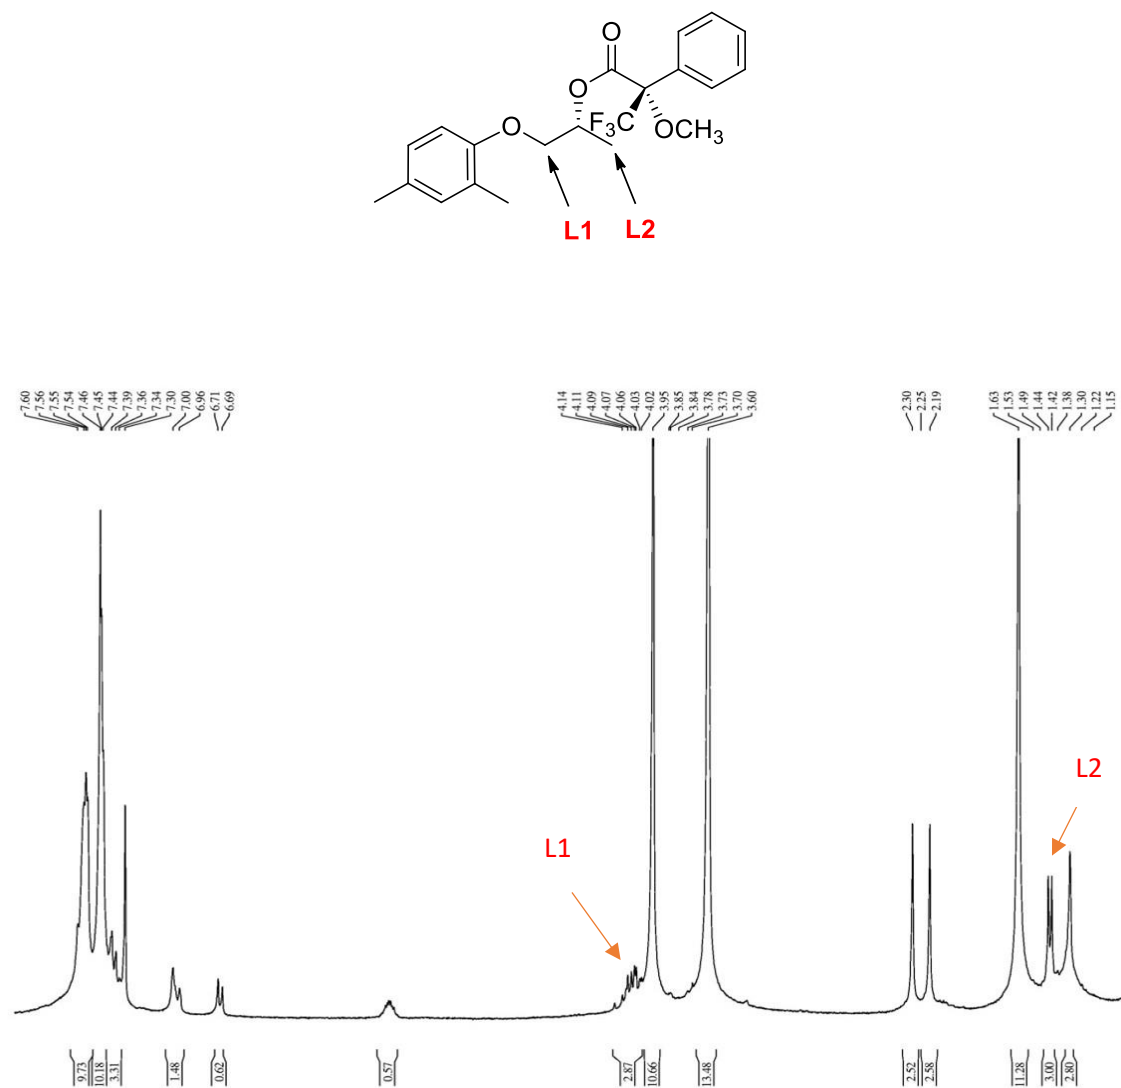

**Figure S25.** NMR  $^1\text{H}$  of (*R*)-ED-4b (300 MHz,  $\text{CDCl}_3$ ).



### Spectroscopic data of (*S*)-ED-4b

$^1\text{H}$  NMR ( $\text{CDCl}_3$ , 300 MHz):  $\delta$  (ppm) 1.43 (d,  $J = 6\text{ Hz}$ , 3H); 2.30 (s, 3H); 2.19 (s, 3H); 3.60 (s, 3H); 4.02 (m, 2H); 5.23 (m, 1H); 6.70 (d,  $J = 6\text{ Hz}$ , 1H); 6.97 (d,  $J = 12\text{ Hz}$ , 2H); 7.45 (m, 3H); 7.55 (d,  $J = 6\text{ Hz}$ , 2H).

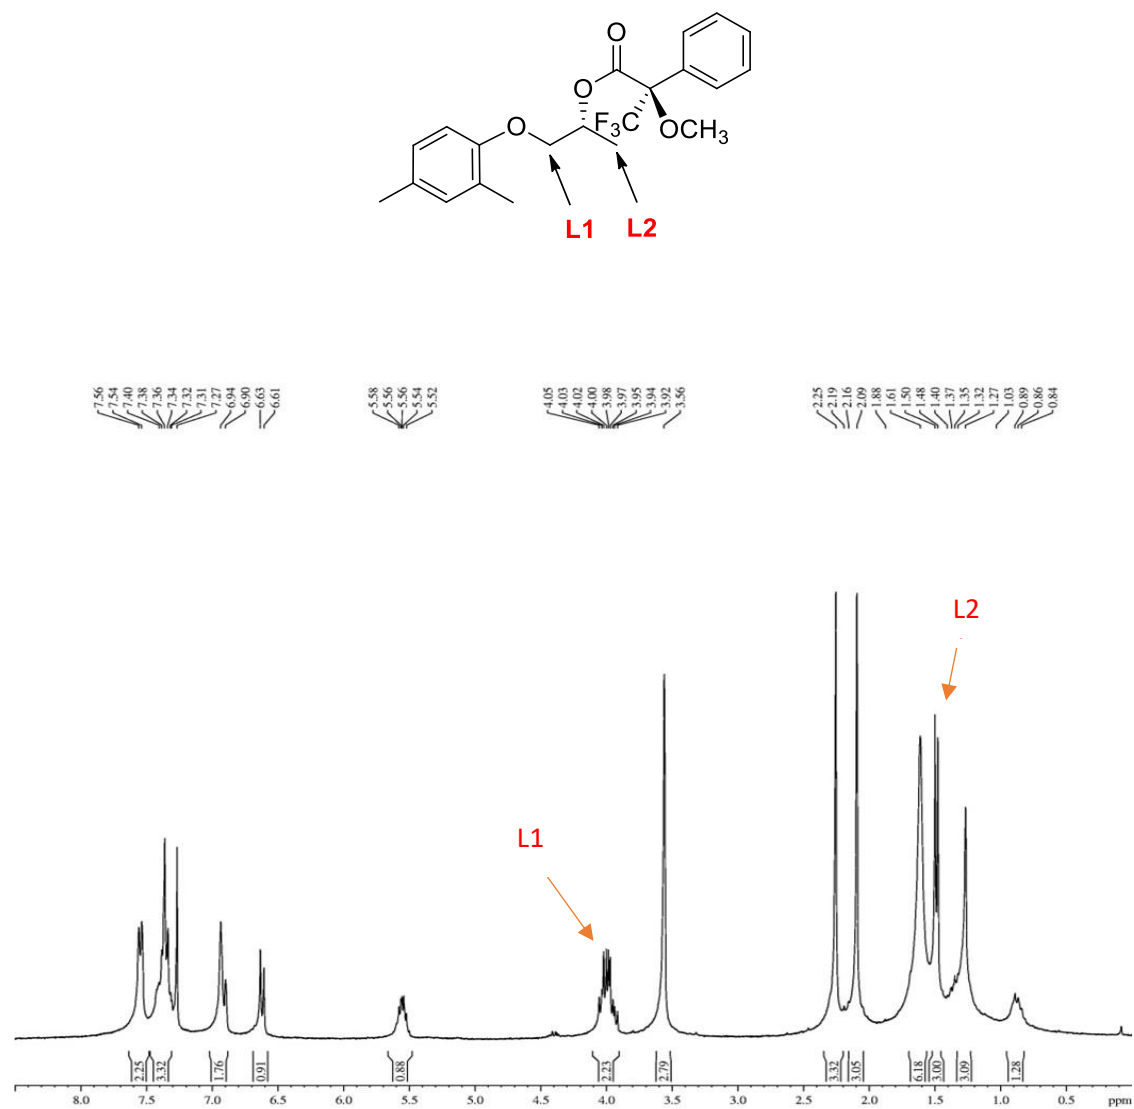

**Figure S26.** NMR  $^1\text{H}$  of (*S*)-ED-4b (300 MHz,  $\text{CDCl}_3$ ).

### Spectroscopic data of (*R*)-ED-4c

$^1\text{H}$  NMR ( $\text{CDCl}_3$ , 300 MHz):  $\delta$  (ppm) 1.44 (d,  $J = 6\text{ Hz}$ , 3H); 2.13 (s, 3H); 3.57 (s, 3H); 4.04 (m, 2H); 5.57 (m, 1H); 6.74 (d,  $J = 9\text{ Hz}$ , 1H); 6.88 (t,  $J = 15$  and  $9\text{ Hz}$ , 2H); 7.32 (m, 5H); 7.57 (d,  $J = 9\text{ Hz}$ , 2H).

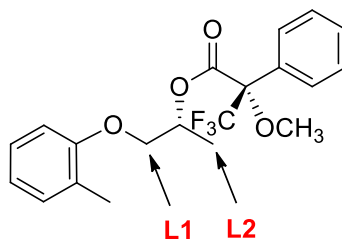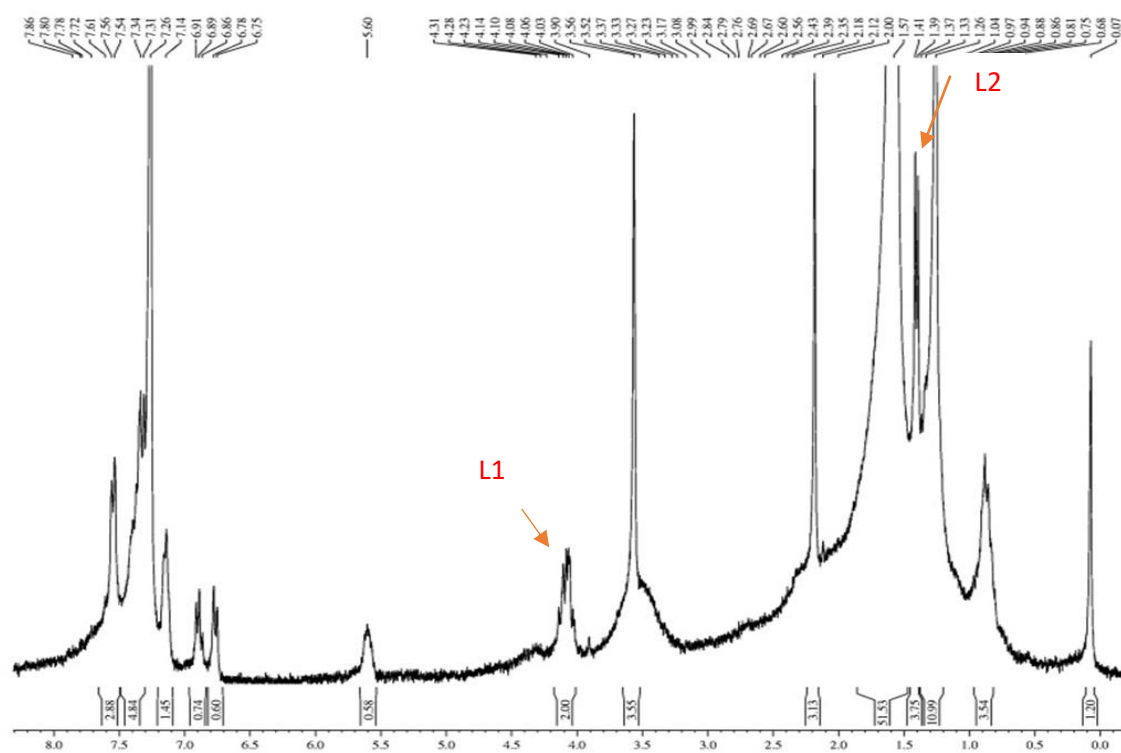

**Figure S27.** NMR  $^1\text{H}$  of (*R*)-ED-4c (300 MHz,  $\text{CDCl}_3$ ).

### Spectroscopic data of (*S*)-ED-4c

$^1\text{H}$  NMR ( $\text{CDCl}_3$ , 300 MHz):  $\delta$  (ppm) 1.38 (d,  $J = 6\text{ Hz}$ , 3H); 2.18 (s, 3H); 3.56 (s, 3H); 4.02 (m, 2H); 5.60 (m, 1H); 6.76 (d,  $J = 9\text{ Hz}$ , 1H); 6.89 (t,  $J = 15$  and  $9\text{ Hz}$ , 1H); 7.14 (s, 1H); 7.31(m, 4H); 7.56 (d,  $J = 6\text{ Hz}$ , 2H).

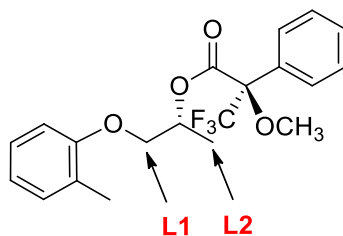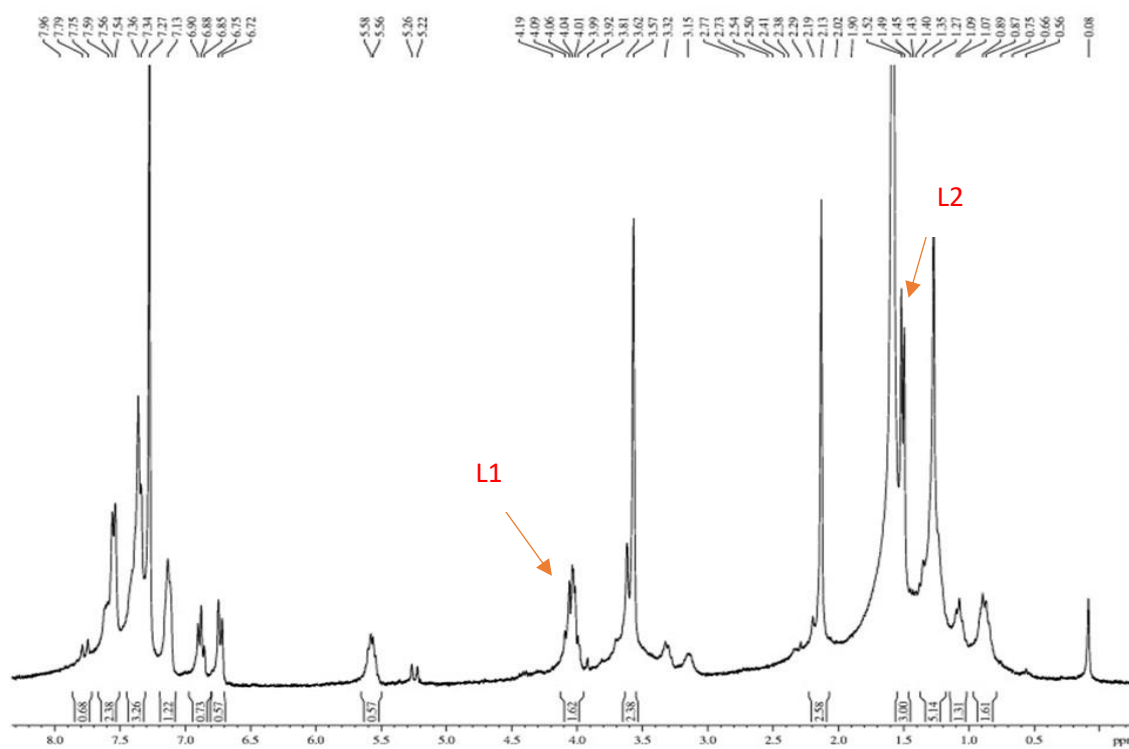

**Figure S28.** NMR  $^1\text{H}$  of (*S*)-ED-4c (300 MHz,  $\text{CDCl}_3$ ).

### Spectroscopic data of (*R*)-ED-4d

$^1\text{H}$  NMR ( $\text{CDCl}_3$ , 300 MHz):  $\delta$  (ppm) 1.56 (d,  $J = 6\text{ Hz}$ , 3H); 3.56 (s, 3H); 4.20 (m, 2H); 5.75 (m, 1H); 6.73 (d,  $J = 6\text{ Hz}$ , 1H); 7.22 (m, 2H); 7.36 (d,  $J = 6\text{ Hz}$ , 2H); 7.46 (m, 3H), 7.54 (d,  $J = 9\text{ Hz}$ , 2H); 7.79 (d,  $J = 9\text{ Hz}$ , 1H); 8.14 (d,  $J = 9\text{ Hz}$ , 1 H).

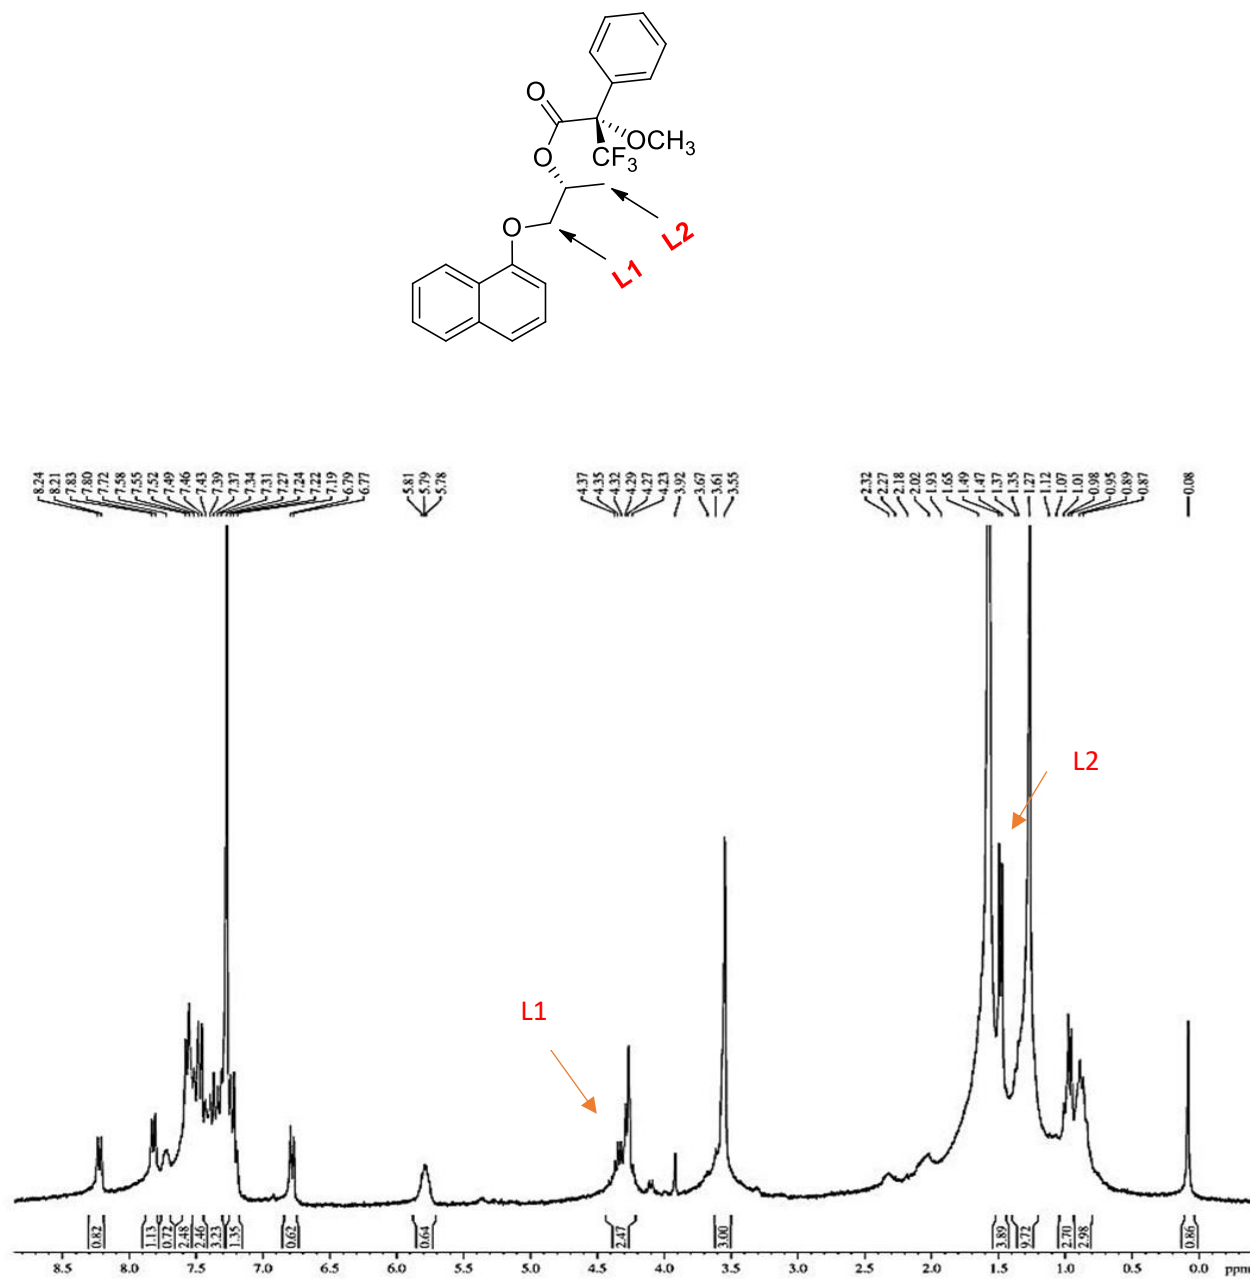

**Figure S29.** NMR  $^1\text{H}$  of (*R*)-ED-4d (300 MHz,  $\text{CDCl}_3$ ).

### Spectroscopic data of (*S*)-ED-4d

$^1\text{H}$  RMN ( $\text{CDCl}_3$ , 300 MHz):  $\delta$  (ppm) 1.36 (d,  $J = 6$  Hz, 3H); 3.60 (s, 3H); 4.32 (m, 2H); 5.79 (m, 1H); 6.78 (d,  $J = 6$  Hz, 1H); 7.22 (m, 2H); 7.34 (m, 3H); 7.43 (m, 2H), 7.57 (d,  $J = 9$  Hz 2H); 7.82 (d,  $J = 9$  Hz 1H), 8.23 (d,  $J = 9$  Hz, 1 H).

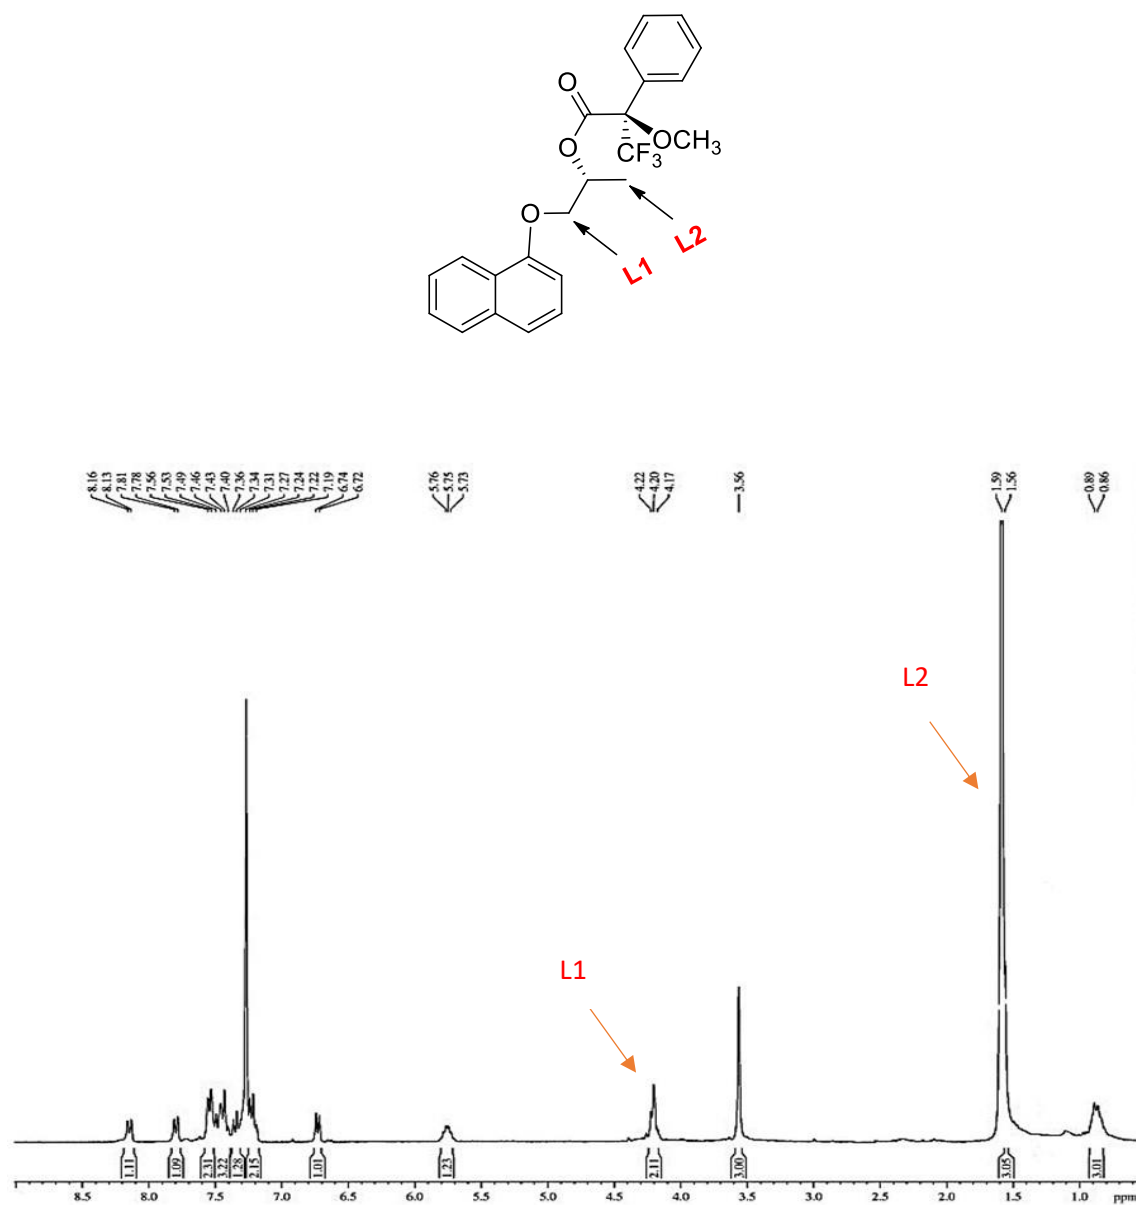

**Figure S30.** NMR  $^1\text{H}$  of (*S*)-ED-4d (300 MHz,  $\text{CDCl}_3$ ).

# Chromatograms obtained by GC/HPLC of alcohols 4a-d and acetates 5a-d

Resolution value (Rs) for *rac*-4a: 2.0

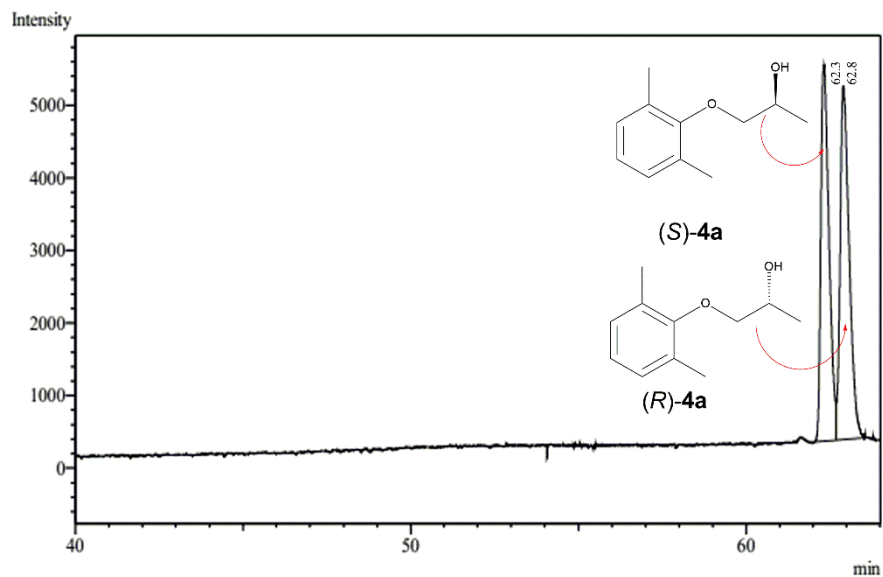

**Figure S31.** Chromatogram obtained by GC from *rac*-4a

Resolution value (Rs) for *rac*-5a: 3.3

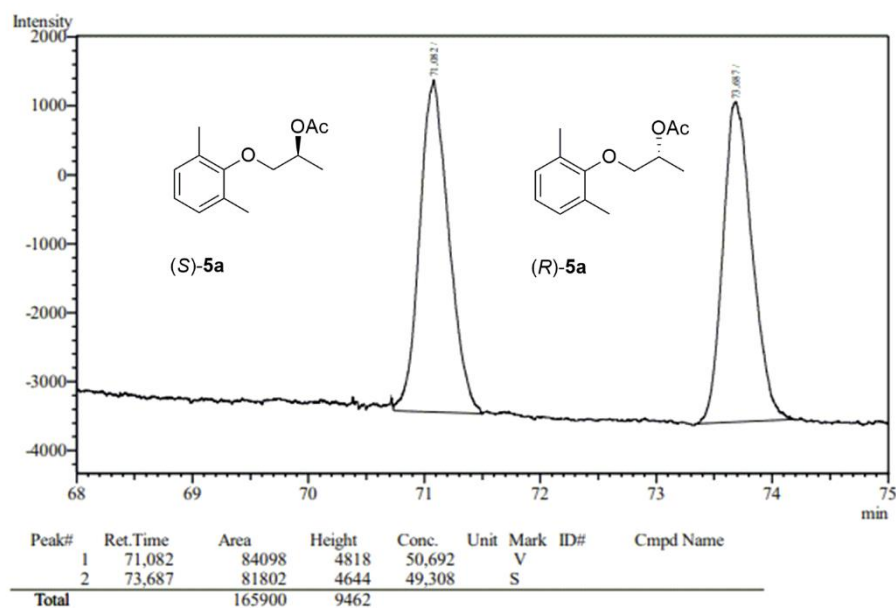

**Figure S32.** Chromatogram obtained by GC from *rac*-5a

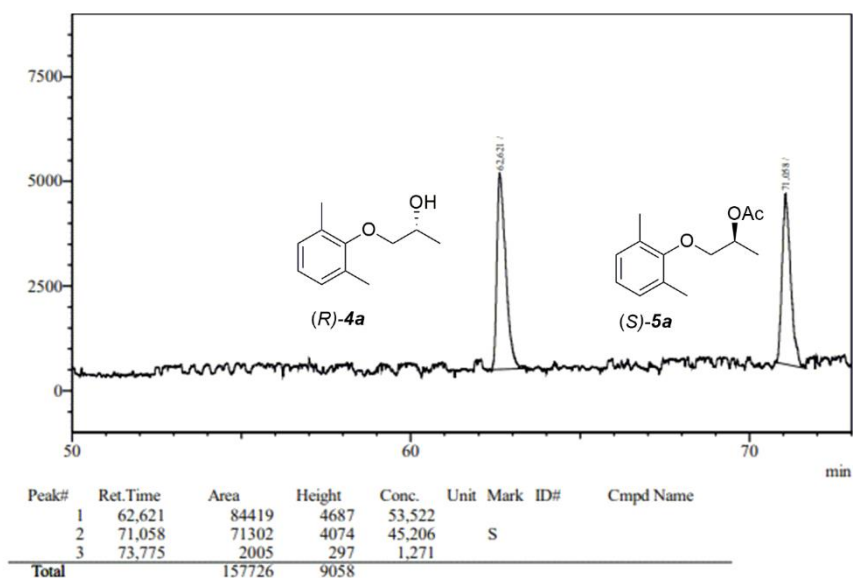

**Figure S33.** Chromatogram obtained by GC from (*R*)-**4a** and (*S*)-**5a** after enzymatic hydrolysis of acetate *rac*-**5a** in the presence of TLL immobilized on Immobead 150, using acetonitrile as co-solvent

Resolution value (*R<sub>s</sub>*) for *rac*-**4b**: 1.5

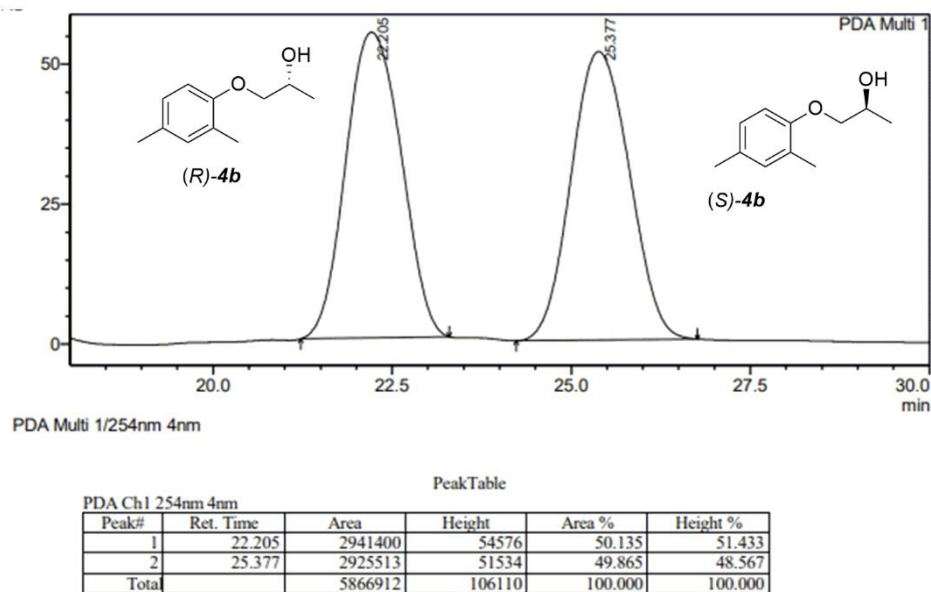

**Figure S34.** Chromatogram obtained by HPLC from *rac*-**4b**

Resolution value ( $R_s$ ) for *rac*-**5b**: 2.3

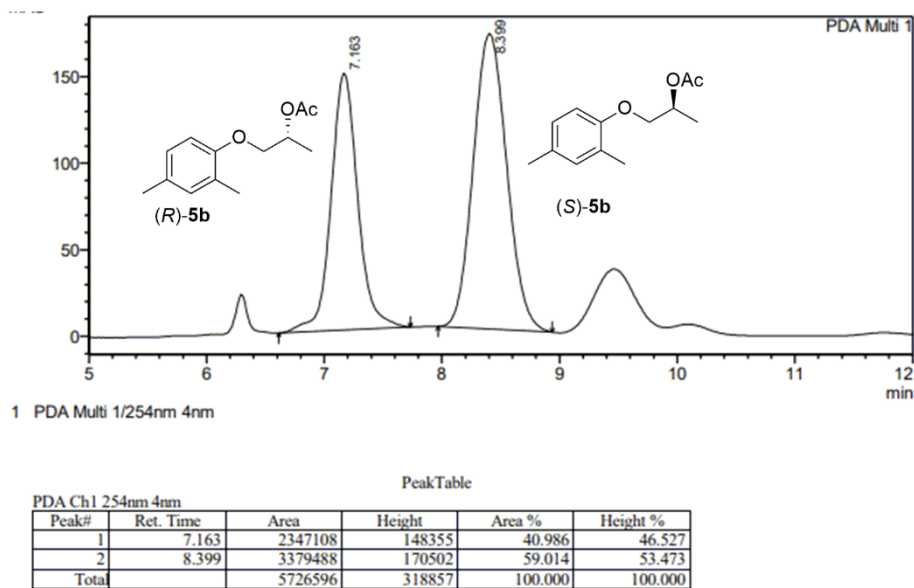

**Figure S35.** Chromatogram obtained by HPLC from *rac*-**5b**

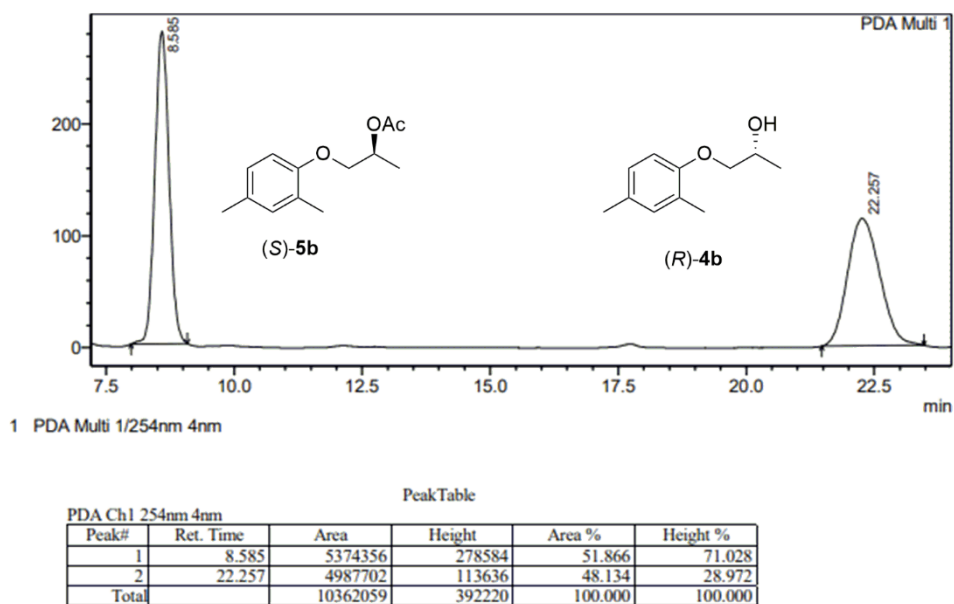

**Figure S36.** Chromatogram obtained by HPLC from (*S*)-**5b** and (*R*)-**4b** after enzymatic hydrolysis of acetate *rac*-**5b** in the presence of TLL immobilized on Immobead 150, using acetonitrile as co-solvent



Resolution value ( $R_s$ ) for *rac*-4c: 2.7

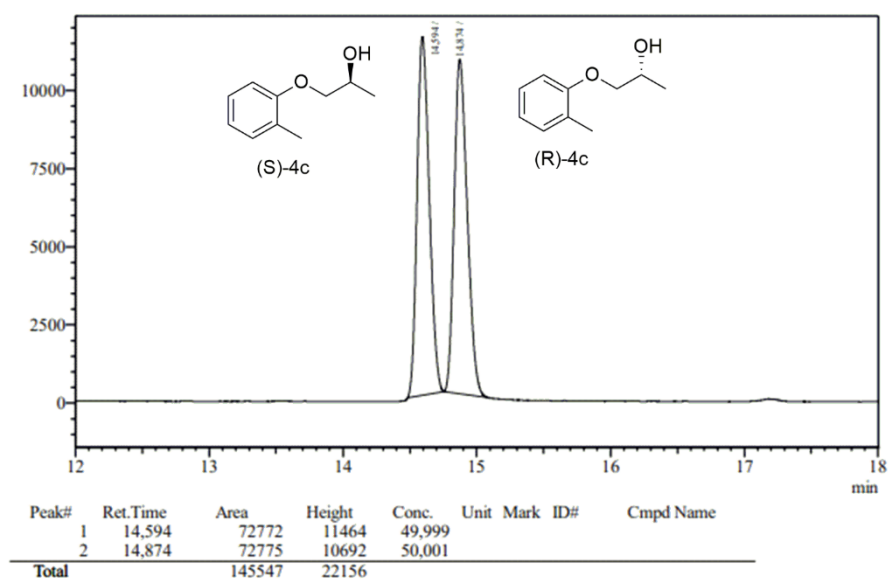

**Figure S37.** Chromatogram obtained by GC from *rac*-4c

Resolution value ( $R_s$ ) for *rac*-5c: 4.5

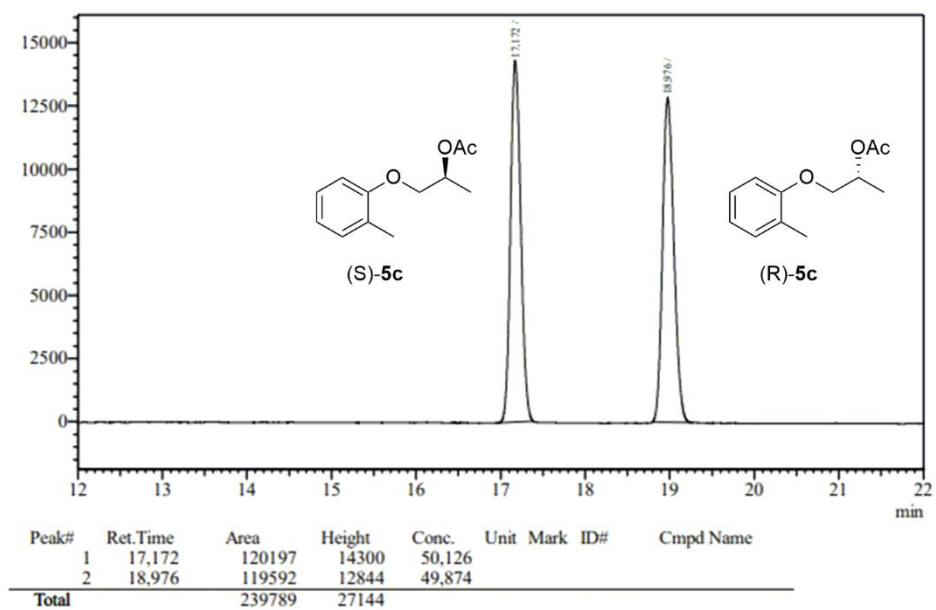

**Figure S38.** Chromatogram obtained by GC from *rac*-5c

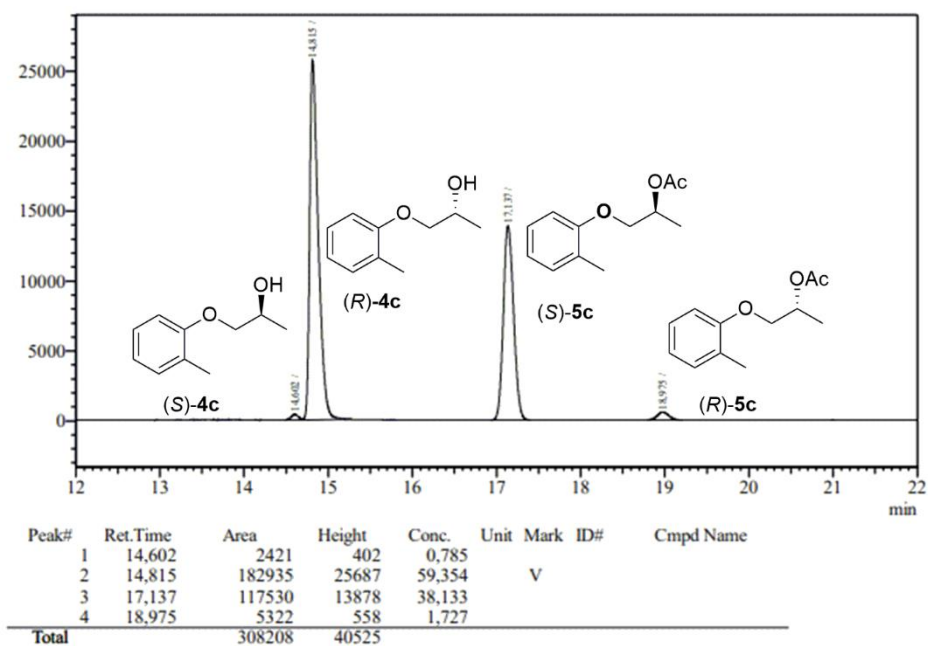

**Figure S39.** Chromatogram obtained by GC from (S)-4c, (R)-4c, (S)-5c and (R)-5c after enzymatic hydrolysis of acetate *rac*-5c in the presence of TLL immobilized on Immobead 150, using acetonitrile as co-solvent

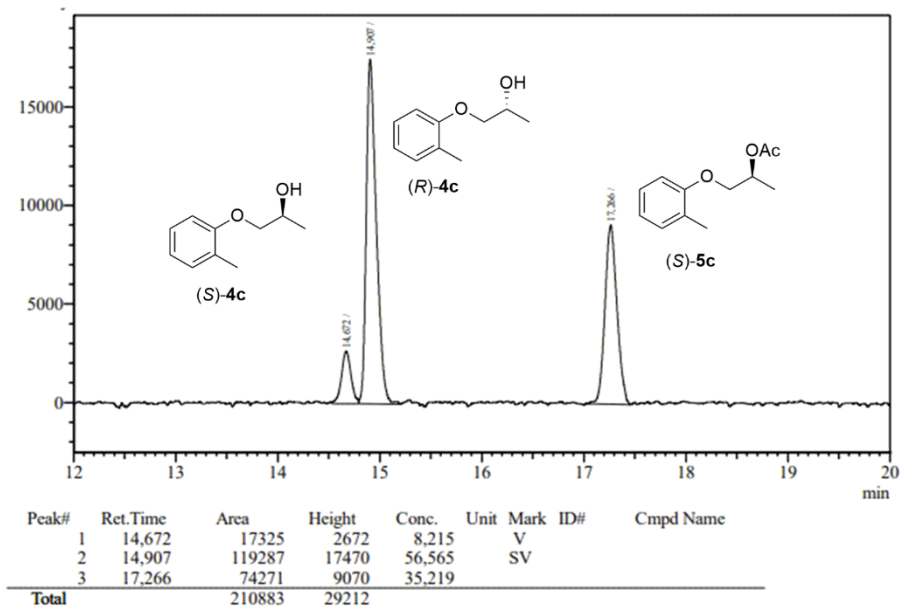

**Figure S40.** Chromatogram obtained by GC from (S)-4c, (R)-4c and (S)-5c after enzymatic hydrolysis of acetate *rac*-5c in the presence of lipase from *P. fluorescens* in the absence of co-solvent

Resolution value ( $R_s$ ) for *rac-4d*: 1.6

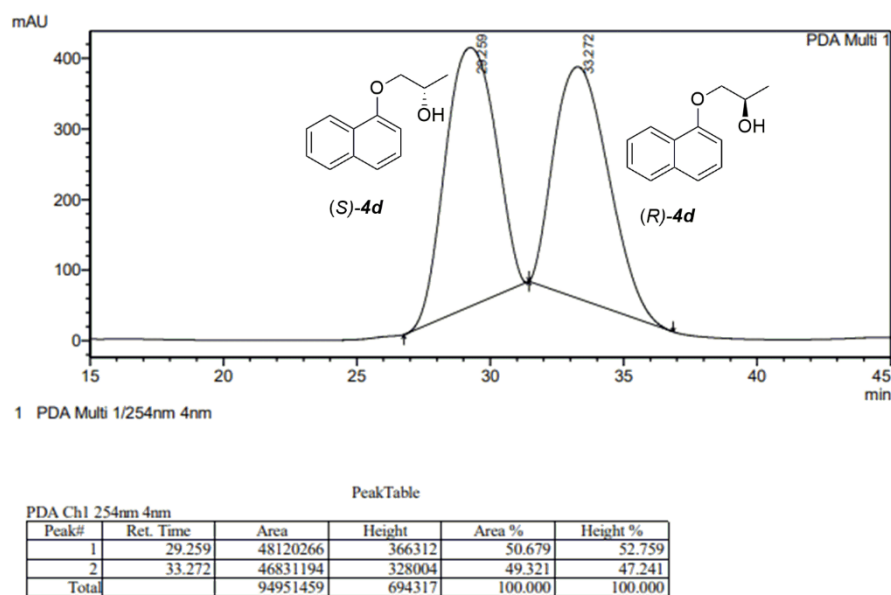

**Figure S41.** Chromatogram obtained by HPLC from *rac-4d*

Resolution value ( $R_s$ ) for *rac-5d*: 4.7

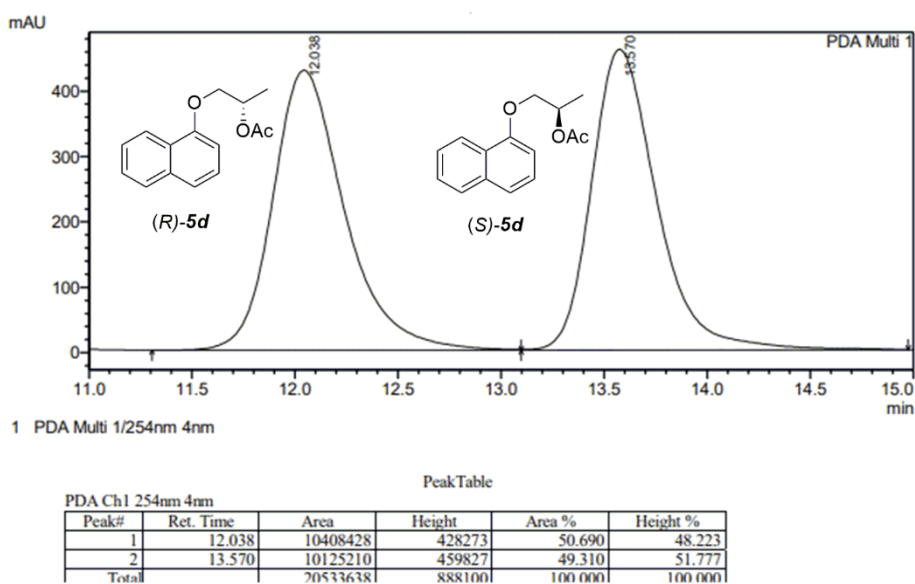

**Figure S42.** Chromatogram obtained by HPLC from *rac-5d*

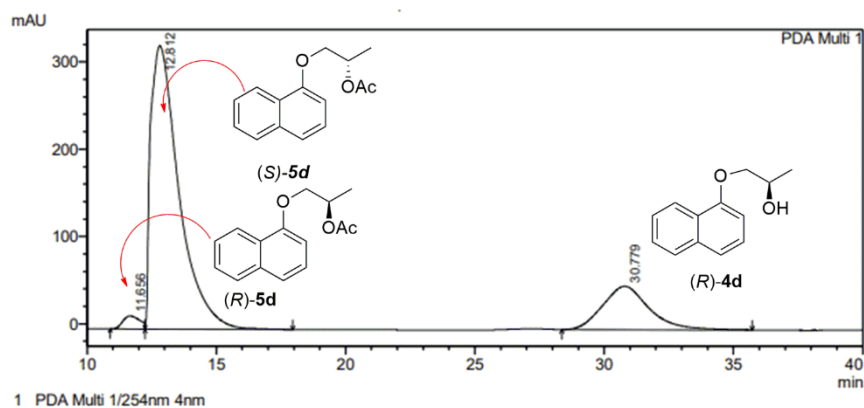

| PeakTable |           |          |        |         |          |
|-----------|-----------|----------|--------|---------|----------|
| Peak#     | Ret. Time | Area     | Height | Area %  | Height % |
| 1         | 11.656    | 676050   | 14890  | 2.139   | 3.824    |
| 2         | 12.812    | 24682916 | 324711 | 78.112  | 83.399   |
| 3         | 30.779    | 6240459  | 49744  | 19.749  | 12.776   |
| Total     |           | 31599425 | 389346 | 100.000 | 100.000  |

**Figure S43.** Chromatogram obtained by HPLC from (*R*)-**5d**, (*S*)-**5d** and (*R*)-**4d** after enzymatic hydrolysis of acetate *rac*-**5d** in the presence of TLL immobilized on Immobead 150, using acetonitrile as co-solvent
